# Supplementary material for: Efficient sex hormone biosensors in Saccharomyces cerevisiae cells to evaluate human aromatase activity and inhibition
Source: PubMed Central journal article supplement — Sci Rep. 2025 Jan 3;15:737. doi: 10.1038/s41598-024-85022-7 (PMC11698725; doi:10.1038/s41598-024-85022-7), 2025-01-03
Supplement: 41598_2024_85022_MOESM1_ESM.pdf [file 41598_2024_85022_MOESM1_ESM.pdf]

# Supplementary material

## Efficient sex-hormone biosensors in *Saccharomyces cerevisiae* cells to evaluate human aromatase activity and inhibition

Jie Wu<sup>1</sup>, Matthias Bureik<sup>1\*</sup>, Mario Andrea Marchisio<sup>1\*</sup>

<sup>1</sup>School of Pharmaceutical Science and Technology, Tianjin University, 300072 Tianjin, China;

<sup>2</sup>Current affiliation: School of Life Science and Health, Northeastern University, 110169 Shenyang, China

\*Corresponding authors. Email addresses: MB: matthias@tju.edu.cn; MAM: marchisio@mail.neu.edu.cn or mamarchisio@yahoo.com

### Supplementary Figures

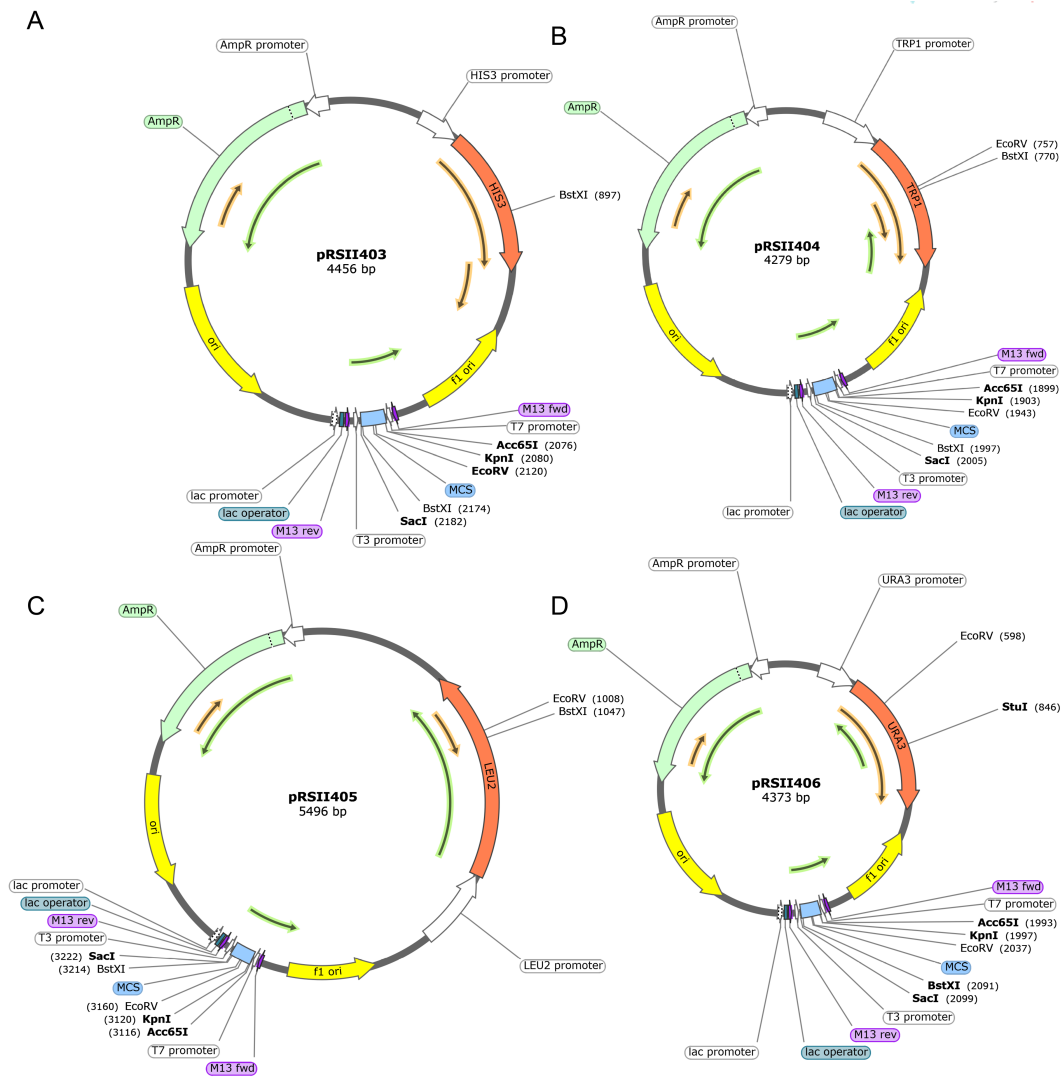

**Figure S1.** Integrative plasmids. (A-D) Map of the four backbones (*E. coli-S. cerevisiae* shuttle vectors) used to construct all plasmids in this work.

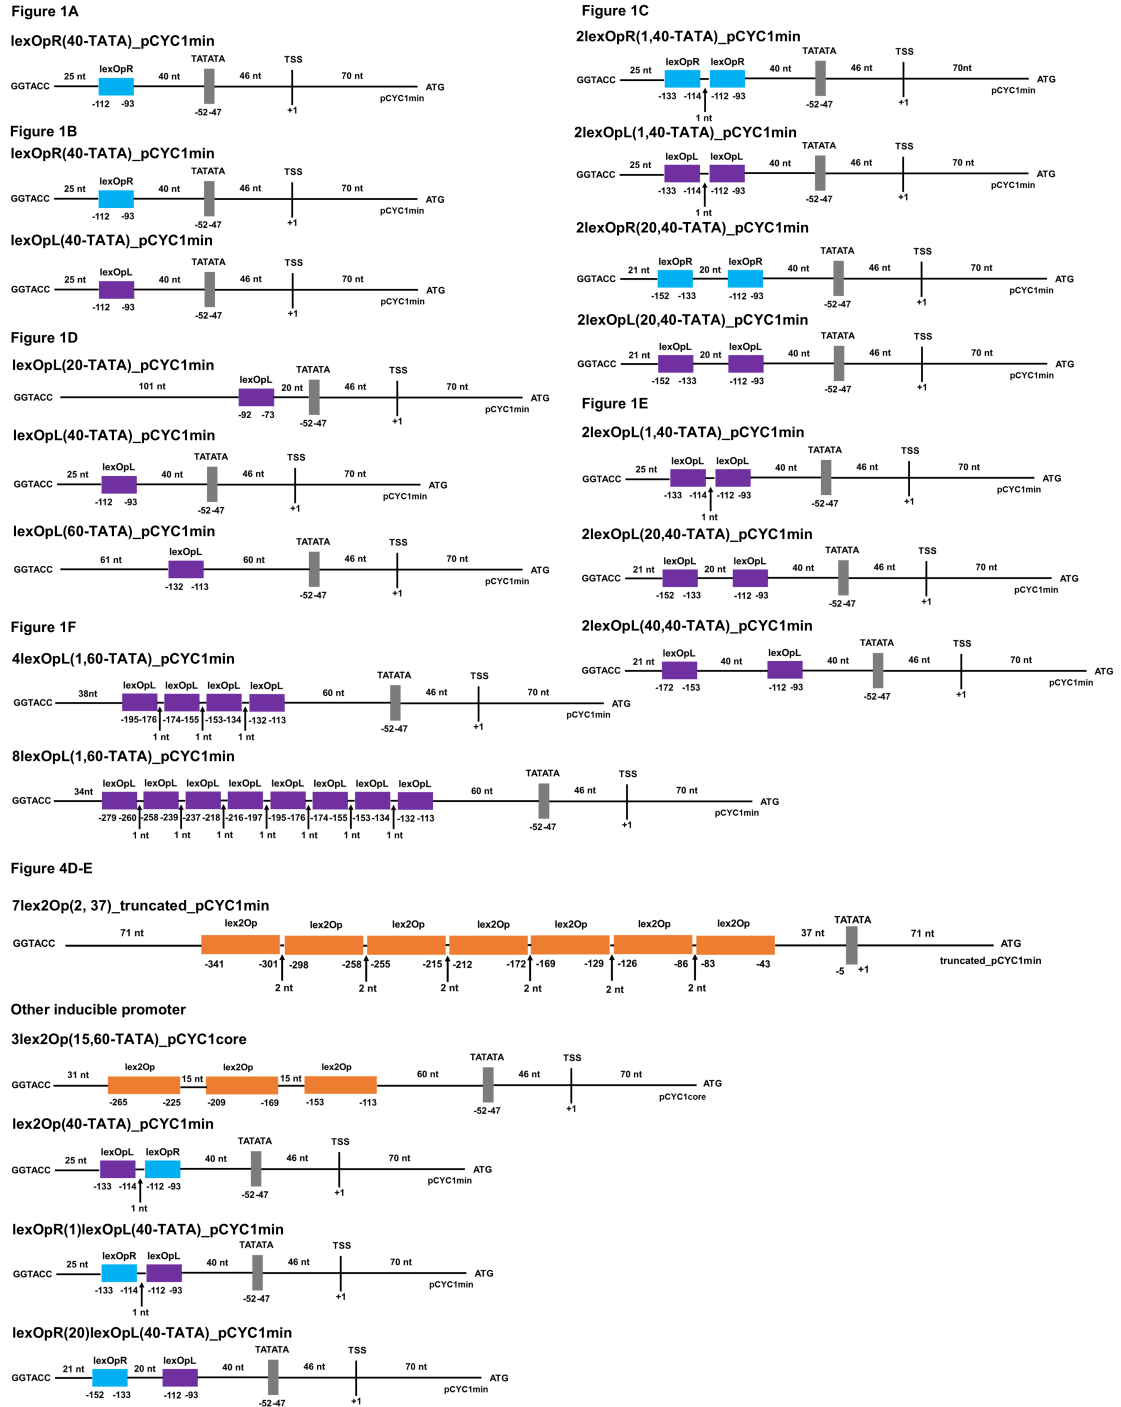

**Figure S2.** Structure of the inducible promoters used in this work.

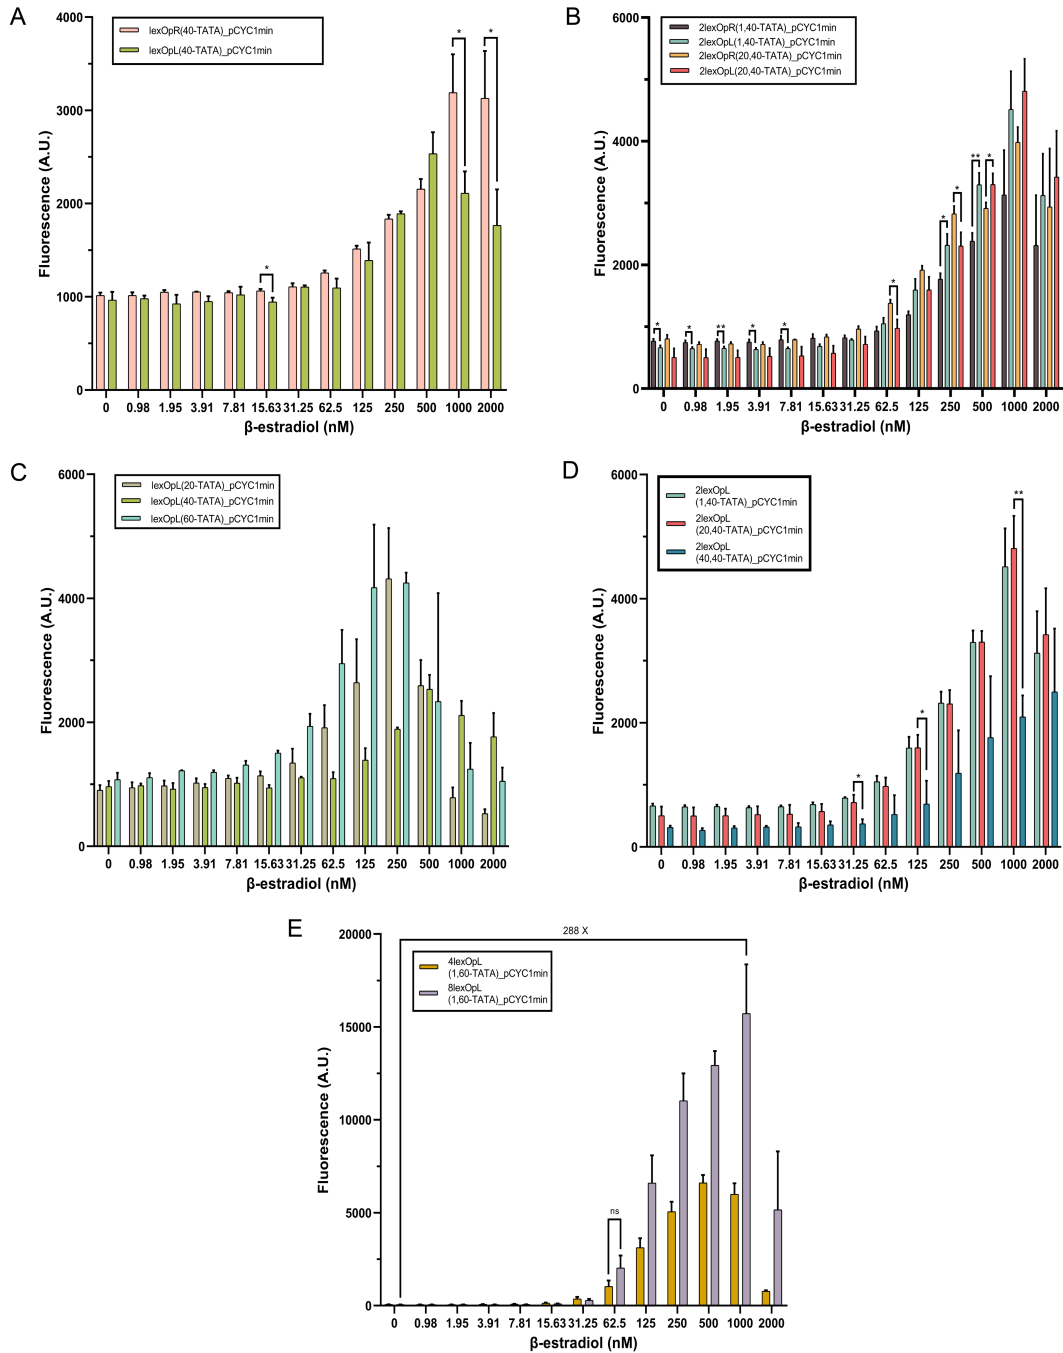

**Figure S3.** Circuits hosting pGPD-B42 in the receptor part. **(A)** A single `lexOpL` and `lexOpR` have comparable performance up to 500 nM  $\beta$ -estradiol (except for 15.63 nM). At higher concentrations, `lexOpR` outperforms `lexOpL` (see Table S10). Moreover, `lexOpR` is also associated with a higher Hill coefficient ( $n = 1.54$ ). **(B)** The performance of `2lexOpL` and `2lexOpR` are similar when the distance between two short `lex` operators is 1 nt and  $\beta$ -estradiol concentration is higher than 15.63 nM (apart from the interval 250-500 nM, where `2lexOpL` returns higher fluorescence). In contrast, when the distance between two short `lex` operators is 20 nt, `lexOpL` and `lexOpR` are significant different only for 62.5, 250, and 500 nM (see Table S11). **(C)** A distance of 40 nt between a single `lexOpL` and `TATA-52` is the only configuration free from toxicity effects. The highest fluorescence value is reached at 500 nM  $\beta$ -estradiol. **(D)** A distance of 1 or 20 nt between two `lexOpL` guarantees higher fluorescence expression (no significant difference between them is present at any concentration of  $\beta$ -estradiol). The fluorescence output by `2lexOpL(40,40-TATA)_pCYC1min` is significantly lower than the other two receptors for 31.25, 125, and 1000 nM  $\beta$ -estradiol (see Table S12). **(E)** The maximum fluorescence of the reporter `8lexOpL(1,60-TATA)_pCYC1min` is 288-fold higher than its basal fluorescence (see Table S13—ns:  $p$ -value  $> 0.05$ ; \*:  $p$ -value  $\leq 0.05$ ; \*\*:  $p$ -value  $\leq 0.01$ ; two-sided Welch's t test).

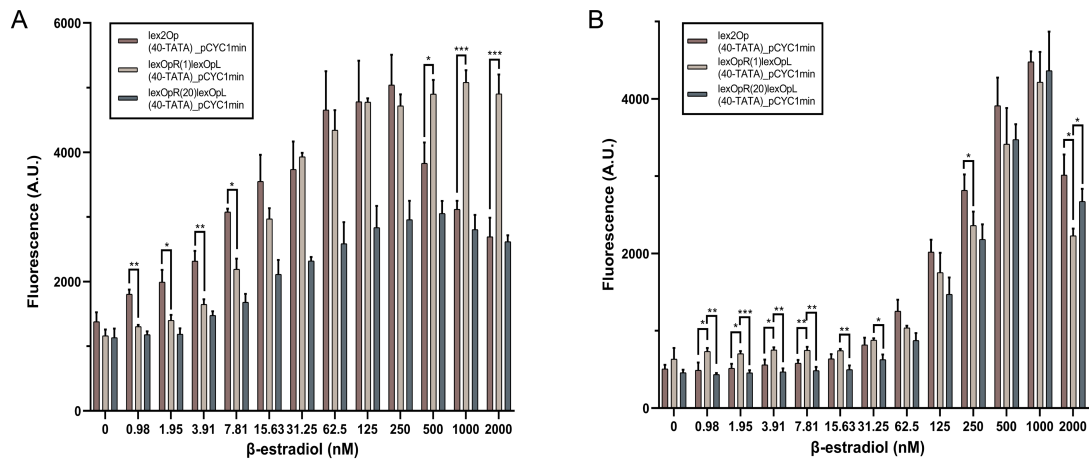

**Figure S4.** Inverse position of lexOpL and lexOpR compared to the original lex2Op. **(A)** When the receptor is DEG1t\_pCYC1noTATA-VP64, lexOpR(1)lexOpL(40-TATA)\_pCYC1min reporter displays a lower fluorescence level than lex2Op between 0.98 and 7.81 nM  $\beta$ -estradiol. However, its fluorescence overcomes that from lex2Op between 500 and 2000 nM  $\beta$ -estradiol. Increasing the distance between lexOpR and lexOpL from 1 to 20 nt results in a lower fluorescence expression in the interval 0.98-2000 nM  $\beta$ -estradiol (see Table S14). **(B)** When the receptor is pGPD-B42, lexOpR(1)lexOpL(40-TATA)\_pCYC1min reporter shows, in contrast, a higher fluorescence than lex2Op between 0.98 and 7.81 nM  $\beta$ -estradiol and a lower one at 250 and 2000 nM  $\beta$ -estradiol. Increasing the distance between lexOpR and lexOpL from 1 to 20 nt results in a lower fluorescence level in the interval 0.98-31.25 nM  $\beta$ -estradiol and higher at 2000 nM (see Table S15—ns: p-value > 0.05; \*: p-value  $\leq$  0.05; \*\*: p-value  $\leq$  0.01; two-sided Welch's t test).

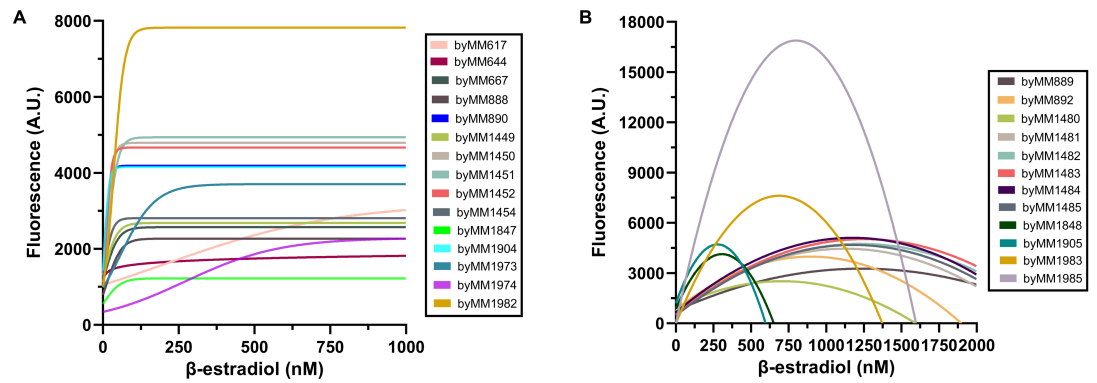

**Figure S5.** Transfer functions. **(A)** Plot of the transfer function in Table S23. Most of these functions contain an exponential term. **(B)** Plot of the transfer function in Table S24. All these functions are written in a quadratic form. For every transfer function,  $R^2$  is greater than 0.95.

## Supplementary Tables

**Table S1.** Plasmids used/constructed in this work.

| Plasmid name | Construction                                                 | Marker |
|--------------|--------------------------------------------------------------|--------|
| pMM197       | pRSII405-pGPD(extra A)-LexA-HBD-VP64-CYC1t                   | LEU2   |
| pMM220       | pRSII406-7lex2Op(2, 37)_truncated_pCYC1min-yEGFP-CYC1t       | URA3   |
| pMM229       | pRSII405-pGPD-LexA-HBD-mDR521_805-CYC1t                      | LEU2   |
| pMM363       | pRSII405-DEG1t_pCYC1noTATA-LexA-HBD-VP64-CYC1t               | LEU2   |
| pMM403       | pRSII405-pGPD-LexA-HBD-B42-CYC1t                             | LEU2   |
| pMM527       | pRSII406-3lex2Op(15,60-TATA)_pCYC1core-yEGFP-CYC1t           | URA3   |
| pMM555       | pRSII405-pCMVc-LexA-HBD-VP64-CYC1t                           | LEU2   |
| pMM802       | pRSII406-lexOpR(40-TATA)_pCYC1min-yEGFPgg-Tsynth24           | URA3   |
| pMM857       | pRSII406-2lexOpR(1,40-TATA)_pCYC1min-yEGFPgg-Tsynth24        | URA3   |
| pMM858       | pRSII406-2lexOpR(20,40-TATA)_pCYC1min-yEGFPgg-Tsynth24       | URA3   |
| pMM1201      | pRSII406-lexOpR(1)lexOpL(40-TATA)_pCYC1min-yEGFPgg-Tsynth24  | URA3   |
| pMM1209      | pRSII406-2lexOpL(20,40-TATA)_pCYC1min-yEGFPgg-Tsynth24       | URA3   |
| pMM1215      | pRSII406-lexOpL(40-TATA)_pCYC1min-yEGFPgg-Tsynth24           | URA3   |
| pMM1216      | pRSII406-2lexOpL(1,40-TATA)_pCYC1min-yEGFPgg-Tsynth24        | URA3   |
| pMM1323      | pRSII406-lexOpL(1)lexOpR(40-TATA)_pCYC1min-yEGFPgg-Tsynth24  | URA3   |
| pMM1324      | pRSII406-lexOpR(20)lexOpL(40-TATA)_pCYC1min-yEGFPgg-Tsynth24 | URA3   |
| pMM1540      | pRSII406-pGPD-CPR-Tsynth6                                    | URA3   |
| pMM1541      | pRSII405-pGPD-CYP2C9-CYC1t_ATC                               | LEU2   |
| pMM1542      | pRSII405-pGPD-CYP5A1-CYC1t_ATC                               | LEU2   |
| pMM1543      | pRSII405-pGPD-CYP19A1-CYC1t_ATC                              | LEU2   |
| pMM1544      | pRSII405-pGPD-CYP1B1-CYC1t_ATC                               | LEU2   |
| pMM1549      | pRSII406-lexOpL(20-TATA)_pCYC1min-yEGFPgg-Tsynth24           | URA3   |
| pMM1551      | pRSII406-lexOpL(60-TATA)_pCYC1min-yEGFPgg-Tsynth24           | URA3   |
| pMM1594      | pRSII403-pGPD-CPR-Tsynth6                                    | HIS3   |
| pMM1595      | pRSII404-pGPD-CYP19A1-CYC1t_ATC                              | TRP1   |
| pMM1607      | pRSII406-2lexOpL(40,40-TATA)_pCYC1min-yEGFPgg-Tsynth24       | URA3   |
| pMM1612      | pRSII406-4lexOpL(1,60-TATA)_pCYC1min-yEGFPgg-Tsynth24        | URA3   |
| pMM1613      | pRSII406-8lexOpL(1,60-TATA)_pCYC1min-yEGFPgg-Tsynth24        | URA3   |

**Table S2.** Operator sequences.

| DNA fragments | Sequence                               |
|---------------|----------------------------------------|
| lex2Op        | TGCTGTATATACTCAGCATAAAGTATATACACCCAGGG |
| lexOpL        | TGCTGTATATACTCAGCA                     |
| lexOpR        | AACTGTATATACACCCAGGG                   |

**Table S3.** Promoter sequences.

| DNA fragments | Sequence                                                                                                                                                                                                                                                                                                                                                                                                                                                                                                                                                                                                                                                                                                                 |
|---------------|--------------------------------------------------------------------------------------------------------------------------------------------------------------------------------------------------------------------------------------------------------------------------------------------------------------------------------------------------------------------------------------------------------------------------------------------------------------------------------------------------------------------------------------------------------------------------------------------------------------------------------------------------------------------------------------------------------------------------|
| pGPD(extra A) | CAGTTCGAGTTTATCATTATCAATACTGCCATTTCAAAGAATACGTAATAATTAATAGTAGTGATTTTCCTAACTTT<br>ATTTAGTCAAAAAATTAGCCTTTTAACTTCTGCTGTAACCCGTACATGCCAAAAATAGGGGGCGGGTTACACAGAATA<br>TATAACATCGTAGGTGTCTGGGTGAACAGTTTATCTGGCATCCACTAAATATAATGGAGCCCGCTTTTAAAGCTGG<br>CATCCAGAAAAAAGAAATCCAGCACCAAAATATTGTTTTCTCACCACCAATCAGTTCATAGGTCCATTCTCTTA<br>GCGCAACTACAGAGAACAGGGGCACAACAGGCCAAAAACGGGCACAACCTCAATGGAGTGATGCAACCTGCCTG<br>GAGTAAATGATGACACAAGGCAATTGACCCACGCATGTATCTATCTCATTTTCTTACACCTTCTATTACCTTCTGCTCT<br>CTCTGATTTGGAAAAAGCTGAAAAAAGGTTGAAACCAAGTCCCTGAAATATTCCCTACTTGACTAATAAGTAT<br>ATAAAGACGGTAGGTATTGATTGTAATCTGTAAATCTATTCTTAAACTTCTTAAATCTACTTTTATAGTTAGTCTT<br>TTTTTTAGTTTTAAACACCAAGAAGCTTAGTTTCGAATAAACACACATAAACAAAAA |
| pGPD          | CAGTTCGAGTTTATCATTATCAATACTGCCATTTCAAAGAATACGTAATAATTAATAGTAGTGATTTTCCTAACTTT<br>ATTTAGTCAAAAAATTAGCCTTTTAACTTCTGCTGTAACCCGTACATGCCAAAAATAGGGGGCGGGTTACACAGAATA<br>TATAACATCGTAGGTGTCTGGGTGAACAGTTTATCTGGCATCCACTAAATATAATGGAGCCCGCTTTTAAAGCTGG<br>CATCCAGAAAAAAGAAATCCAGCACCAAAATATTGTTTTCTCACCACCAATCAGTTCATAGGTCCATTCTCTTA<br>GCGCAACTACAGAGAACAGGGGCACAACAGGCCAAAAACGGGCACAACCTCAATGGAGTGATGCAACCTGCCTG<br>GAGTAAATGATGACACAAGGCAATTGACCCACGCATGTATCTATCTCATTTTCTTACACCTTCTATTACCTTCTGCTCT<br>CTCTGATTTGGAAAAAGCTGAAAAAAGGTTGAAACCAAGTCCCTGAAATATTCCCTACTTGACTAATAAGTAT<br>ATAAAGACGGTAGGTATTGATTGTAATCTGTAAATCTATTCTTAAACTTCTTAAATCTACTTTTATAGTTAGTCTT<br>TTTTTTAGTTTTAAACACCAAGAAGCTTAGTTTCGAATAAACACACATAAACAAAAA |
| pCMVc         | AATTGCATGAAGAATCTGCTTAGGGTTAGCGCTTTTGGCTGCTTCGGATGTACGGCCAGATATACGGCTTGACAT<br>TGATTTAGTACTAGTTAATAATAGTAATCAATTACGGGGTCAATAGTTTCATAGCCCATATATGGAGTTCGGCGTTACA<br>TAACCTACGGTAAATGGCCCGCTGGCTGACCGCCCAACGACCCCGCCATTGACGTCAATAATGACGTATGTTCC<br>CATAGTAACGCCAATAGGACTTCCATTGACGTCAATGGGTGGACTATTACGGTAAACTGCCACTTGGCAGTAC<br>ATCAAGTGTATCATATGCCAAGTACGCCCTTATTGACGTCAATGACGGTAAATGGCCCGCTGGCATTATGCCAG                                                                                                                                                                                                                                                                                                                  |

|                                                |                                                                                                                                                                                                                                                                                                                                                                                                                                                      |
|------------------------------------------------|------------------------------------------------------------------------------------------------------------------------------------------------------------------------------------------------------------------------------------------------------------------------------------------------------------------------------------------------------------------------------------------------------------------------------------------------------|
|                                                | TACATGACCTTATGGGACTTTCCTACTTGGCAGTACATCTACGTATTAGTCATCGCTATTACCATGGTGTATGCGGTTTT<br>GGCAGTACATCAATGGGCGTGGATAGCGGTTTGACTCACGGGGATTTCGAAGTCCACCCCATTTGACGTCAATGGG<br>AGTTTGGTTTGGACCAAAAATCAACGGGACTTCCAAAATGTCGTAACAACCTCCGCCCATTTGACGCAAAATGGGCGG<br>TAGGCGTGTACGGTGGAGGCTCTATAAAGCAGAGCTCTCTGGCTAACTAGAGAACCCTGCTTACTGGCTTATCG<br>AAATTAATACGACTCACTATAGGAGACCAAGCTGGCTAGTT                                                                        |
| DEGI <sub>t</sub> _pCYC1 <sub>noTATA</sub>     | AAATAATATAAACCTGTATAATATAACCTTGAAGACTATAATTTCTTTCTTCTTCTTATACATAGGACCTTTGCAGC<br>ATAAATTACTATACTTCTATAGACACAAAACAAAATACACACTAAATTAATA                                                                                                                                                                                                                                                                                                                |
| truncated_pCYC1 <sub>min</sub>                 | GAAGACAAGAGCGGAGTGGCTTGCCTTGTCTTCGCATGCATGTeCTCTGTATGTATATAAACTCTGTTTTCTTCTT<br>TTCTCTAAATATTTCTTCTTATACATAGGACCTTTGCAGCATAAAATTAa                                                                                                                                                                                                                                                                                                                   |
| pCYC1 <sub>min</sub>                           | CAGATCCGCCAGGCGTGTATATATAGCGTGGATGGCCAGGCACTTTAGTGTGACACATACAGCAGACATGATCA<br>TATGGCATGCATGTGCTCTGTATGTATATAAACTCTGTTTTCTTCTTTCTCTAAATATTTCTTCTTATACATAGG<br>ACCTTTGCAGCATAAATTACTATACTTCTATAGACACAAAACAAAATACACACTAAATTAATA                                                                                                                                                                                                                         |
| pCYC1 <sub>core</sub>                          | CAGATCCGCCAGGCGTGTATATATAGCGTGGATGGCCAGGCACTTTAGTGTGACACATACAGGCATATATATATG<br>TGTGCGACGACACATGATCATATGGCATGCATGTGCTGTATGTATATAAACTCTGTTTTCTTCTTCTTCTAAAT<br>ATTTCTTCTTATACATAGGACCTTTGCAGCATAAATTAATTAATTAATTAATTAATTAATTAATTAATTAATTAAT                                                                                                                                                                                                            |
| lexOpL(1)lexOpR(40-TATA)_pCYC1 <sub>min</sub>  | CAGGCACTTTAGTGTGACACATATGCTGTATATACTCACAGCATAACTGTATATACACCCAGGGCGAGCAGACAT<br>GATCATATGGCATGCATGTGCTCTGTATGTATATAAACTCTGTTTTCTTCTTTCTCTAAATATTTCTTCTTATAC<br>ATTAGGACCTTTGCAGCATAAATTAATTAATTAATTAATTAATTAATTAATTAATTAATTAATTAATTAATTAAT                                                                                                                                                                                                            |
| 3lex2Op(15,60-TATA)_pCYC1 <sub>core</sub>      | CAGATCCGCCAGGCGTGTATATATAGCGTGGTGTATATACTCACAGCATAACTGTATATACACCCAGGGATGGC<br>CAGGCACTTTGCTGTATATACTCACAGCATAACTGTATATACACCCAGGGTGTGCTGACACATATGCTGTATATAC<br>TCACAGCATAACTGTATATACACCCAGGGCAGCATATATATGTTGGCAGCAGACATGATCATATGGCATGCAT<br>GTGCTCTGTATGTATATAAACTCTGTTTTCTTCTTCTTCTAAATATTTCTTCTTATACATAGGACCTTTGCAGCA<br>TAAATTAATTAATTAATTAATTAATTAATTAATTAATTAATTAATTAATTAATTAATTAATTAATTAATTAAT                                                  |
| 7lex2Op(2, 37)_truncated_pCYC1 <sub>min</sub>  | GAAGACAAGAGCGGAGTGTCTGTATATACTCACAGCATAACTGTATATACACCCAGGGGTGCTGTATATACTCAC<br>GCATAACTGTATATACACCCAGGGTGTGCTGTATATACTCACAGCATAACTGTATATACACCCAGGGTGTGCTGTAT<br>TACTCACAGCATAACTGTATATACACCCAGGGTGTGCTGTATATACTCACAGCATAACTGTATATACACCCAGGGT<br>GCTGTATATACTCACAGCATAACTGTATATACACCCAGGGTGTGCTGTATATACTCACAGCATAACTGTATATACCC<br>CAGGGCGCTTGCCTTGTCTTCGCATGCATGTeCTCTGTATGTATATAAACTCTGTTTTCTTCTTCTTCTAAATAT<br>CTTCTTATACATAGGACCTTTGCAGCATAAAATTAa |
| lexOpR(40-TATA)_pCYC1 <sub>min</sub>           | CAGGCACTTTAGTGTGACACATAAACTGTATATACACCCAGGGCGAGCAGACATGATCATATGGCATGCATGTGC<br>TCTGTATGTATATAAACTCTGTTTTCTTCTTTCTCTAAATATTTCTTCTTATACATTAGGACCTTTGCAGCATAA<br>ATTACTATACTTCTATAGACACAAAACAAAATACACACTAAATTAATA                                                                                                                                                                                                                                       |
| 2lexOpR(1,40-TATA)_pCYC1 <sub>min</sub>        | CAGGCACTTTAGTGTGACACATAAACTGTATATACACCCAGGGTAACTGTATATACACCCAGGGCGAGCAGACAT<br>GATCATATGGCATGCATGTGCTCTGTATGTATATAAACTCTGTTTTCTTCTTTCTCTAAATATTTCTTCTTATAC<br>ATTAGGACCTTTGCAGCATAAATTAATTAATTAATTAATTAATTAATTAATTAATTAATTAATTAATTAATTAAT                                                                                                                                                                                                            |
| 2lexOpR(20,40-TATA)_pCYC1 <sub>min</sub>       | CAGATCCGCCAGGCGTGAATAAACTGTATATACACCCAGGAACTTTAGTGTGACACATAAACTGTATATACACCC<br>AGGGCGAGCAGACATGATCATATGGCATGCATGTGCTCTGTATGTATATAAACTCTGTTTTCTTCTTCTTCTAAA<br>TATTTCTTCTTATACATTAGGACCTTTGCAGCATAAATTAATTAATTAATTAATTAATTAATTAATTAATTAAT<br>CTAAATTAATA                                                                                                                                                                                              |
| lexOpR(1)lexOpL(40-TATA)_pCYC1 <sub>min</sub>  | CAGGCACTTTAGTGTGACACATAAACTGTATATACACCCAGGGTGTGCTGTATATACTCACAGCAGCAGCAGACAT<br>GATCATATGGCATGCATGTGCTCTGTATGTATATAAACTCTGTTTTCTTCTTTCTCTAAATATTTCTTCTTATAC<br>ATTAGGACCTTTGCAGCATAAATTAATTAATTAATTAATTAATTAATTAATTAATTAATTAATTAATTAATTAAT                                                                                                                                                                                                           |
| lexOpR(20)lexOpL(40-TATA)_pCYC1 <sub>min</sub> | CAGATCCGCCAGGCGTGAATAAACTGTATATACACCCAGGAACTTTAGTGTGACACATATGCTGTATATACTCAC<br>AGCAGCAGCAGACATGATCATATGGCATGCATGTGCTCTGTATGTATATAAACTCTGTTTTCTTCTTCTTCTAAA<br>TATTTCTTCTTATACATTAGGACCTTTGCAGCATAAATTAATTAATTAATTAATTAATTAATTAATTAATTAAT<br>CTAAATTAATA                                                                                                                                                                                              |
| lexOpL(20-TATA)_pCYC1 <sub>min</sub>           | CAGATCCGCCAGGCGTGTATATATAGCGTGGATGGCCAGGCACTTTAGTGTGACACATACAGGCATATATATATG<br>TGTGCGACGACACATGATCATATGCTGTATATACTCACAGCAGATGCATGTGCTCTGTATGTATATAAACTCTT<br>GTTTTCTTCTTCTTCTAAATATTTCTTCTTATACATTAGGACCTTTGCAGCATAAATTAATTAATTAATTAATTAAT<br>CAAAACAAAATACACACTAAATTAATA                                                                                                                                                                            |
| lexOpL(40-TATA)_pCYC1 <sub>min</sub>           | CAGGCACTTTAGTGTGACACATATGCTGTATATACTCACAGCAGCAGCAGACATGATCATATGGCATGCATGTGC<br>TCTGTATGTATATAAACTCTGTTTTCTTCTTTCTCTAAATATTTCTTCTTATACATTAGGACCTTTGCAGCATAA<br>ATTACTATACTTCTATAGACACAAAACAAAATACACACTAAATTAATA                                                                                                                                                                                                                                       |
| lexOpL(60-TATA)_pCYC1 <sub>min</sub>           | CAGATCCGCCAGGCGTGTATATATAGCGTGGATGGCCAGGCACTTTAGTGTGACACATATGCTGTATATACTCAC<br>AGCAGGACATATATATGTTGGCAGCAGCAGACATGATCATATGGCATGCATGTGCTCTGTATGTATATAAACTCT<br>TGTCTTCTTCTTCTTCTAAATATTTCTTCTTATACATTAGGACCTTTGCAGCATAAATTAATTAATTAATTAAT<br>ACAAAACAAAATACACACTAAATTAATA                                                                                                                                                                             |
| 2lexOpL(1,40-TATA)_pCYC1 <sub>min</sub>        | CAGGCACTTTAGTGTGACACATATGCTGTATATACTCACAGCATTGCTGTATATACTCACAGCAGCAGCAGACAT<br>GATCATATGGCATGCATGTGCTCTGTATGTATATAAACTCTGTTTTCTTCTTTCTCTAAATATTTCTTCTTATAC<br>ATTAGGACCTTTGCAGCATAAATTAATTAATTAATTAATTAATTAATTAATTAATTAATTAATTAATTAATTAAT                                                                                                                                                                                                            |
| 2lexOpL(20,40-TATA)_pCYC1 <sub>min</sub>       | CAGATCCGCCAGGCGTGAATAAAGTGTATATACTCACAGAAACTTTAGTGTGACACATATGCTGTATATACTCAC<br>AGCAGCAGCAGACATGATCATATGGCATGCATGTGCTCTGTATGTATATAAACTCTGTTTTCTTCTTCTTCTAAA<br>TATTTCTTCTTATACATTAGGACCTTTGCAGCATAAATTAATTAATTAATTAATTAATTAATTAATTAATTAAT<br>CTAAATTAATA                                                                                                                                                                                              |
| 2lexOpL(40,40-TATA)_pCYC1 <sub>min</sub>       | CAGATCCGCCAGGCGTGTATATGCTGTATATACTCACAGCATAAGCGTGGATGGCCAGGCACTTTAGTGTGACA<br>CATATGCTGTATATACTCACAGCAGCAGCAGACATGATCATATGGCATGCATGTGCTCTGTATGTATATAAACTCTT                                                                                                                                                                                                                                                                                          |



CTCCATTATTTCCACAACGTTTTGACTACAAAGATCAACAGTCTTGAATCTGATGGAAAAGCTGAACGAAAACATCAAGATCTTT  
CATCTCTTGGATACAGATCTGTAACAATTTCAAGTCTTATCATGATTACTTTCCAGGTAACAATAAGCTGTTAAAAACGTAAGCAT  
TCATGAAGAGCTACATTTTGGAGAAAGTTAAGGAACATCAAGAGTCTATGGACATGAACAATCTCAAGACTCATGAGCTGTTCTCTG  
ATGAAAAATGGAGAAAAGAAAAGCAATCAACCTTCTGAATTCACCATTGAATCACTTGAGAATACAGCTGTGATTTGTTGGTGTG  
GTACTGAAAACCACTACTACTACACTAGTTAGCTTACTGTTGCTACTTAAAGCATCCAGAAGTACTGCAAAAAGTTCAGGAAGAAATC  
GAGAGAGTAATTTGGTCTAATCGTTACCTGTATGCAAGATCGAAGTCACTGCCTTATACTGATGGCTGTGAAAGATAACAG  
TTACATCGACTACTACTACTAGTTTACCTCATGCAGTTACTTGGATATCAAGTTTCGCAACTACTTGTATACAAAAGGTAACCAT  
ACTTATCTCACTACTTCTGCTTACACGATAACAAGGATTTCCAAATCTGAAATGTTTGTATCTCACCATTTCCTAGATGAAGGAG  
GTAACCTCAAGAAAAGCAAGTATTTATGCCTTTTTCAGCTGAAAACGTAATTTGTTGGTGAAGCTTTAGCTGGTATGAACTATTC  
CTGTCTTAAACGCTACTTCTGCAAACTTCAACCTGAAGAGTTTAGTCGATCTAAAAACCTGGACACTACACCAGTTGTGAATGGTTTT  
GCTTCAGTCTCCATTTTACCAGCTTTGTTTATACCCGTTTAA

CYP5A1

ATGATGGAAGCTCTGGTTTCTTAAAGCTGGAAGTAAATGGTCTATGTTACCGTTGCTTTATCTGTGCTTACTTGTCTTTTGAAGT  
GGTACTCTACCTCTGCTTTTCCCGCTTGA AAAAAGCTGGTTTGGCTCATCTAAACCTTCTCCATCTATGGTAACCTTACATTTCTTCG  
TCAAGGTTTTCTGGAGTCTCAAATGGAACCTCTGTAACCTTATGTTCTCTTTGCGGTAATATCTTGGCTGCTATGTTCAATGCTCAT  
TCTGAACCTGACATGATCAAGCAAGTCTTGTGGAAGCTTCTCAACCTTACCAATCTGATGGCTTCTGGTCTTGAAGTTAAGCTGTT  
GCTGATTCGGTCTTTTCTCTGTCGACAAACGTTGGGAAGAAGTTAGAGGGCTTAAATGTCAGCTTTTCTCCCGAAAACTTAACGA  
GATGGTCCCTTAAATTTCAAGCTTGGCATCTTCTTTGGCTCATCTTAAACGTTATGCTGAAATCGTGGATGCTTCCGATTAAGCA  
TGCTACTGCAACTACTACTGATGTTGCTTCAAGTGTCTTGGTACTCTGTTGATTTTGGCAAGCTCTGAAGATCTTTTGTTA  
AGCACTGCAAGCGTTTTTTCGAATCTGATTCCTCTGCTATCTTGTCTGTTGTTCTTTTCCCTCTATTATGGTTCCTTGTCTGT  
ATCTTCTCAAAAAATCGTATGAGCTTAAACGCTTCTTCAACAAGCTTATTCGTAACGTTATGCTTGGCTGATCAACAAGCACT  
GAAGAACGTCGTGATTTTTTACAAATGTTCTGATGCTGCTCATCTGCTTCTCAATGGGTGTTCAAGATTTGATATTGCTCGT  
GACGTTTTCTTCTACTGGTTGTAACCTAATCTTCTGCTCAACATCAACCTTACCTATGGCTGCTCTTAACTGTGATGAGATA  
GTGGTCAGGCTTCAATTTCTTATTGCTGCTACGAGATTATCAACAACCTTTGCTTTTGGCAAGCTTCTGCTGCTGCTGCTGCTG  
ATTGTCAGAGAAGCTTTTGGCTGAGGTTGACGTTTTTAAAGAAAACACATGGCCCTGAGTTTTGCTCATTAGAAGAAGTTTGGCT  
TACCTTGACATGGTTATGCTGAAACTCTTCTGATGATCTCTGCTTTTCTGTTTTACTGCTGAAGCTGCTCAAGATTGTGAAGTTTTAG  
GTCAACGATTTCTGCTGGTCTGTTTTAGAAAAGGCTGTTGGTGTTTACATCATGATCCTGAACATGGCTTCCGCTGATCAACA  
ATCTGAACTTTTACAGCTGAAGCTGCTGACCAACATCGTCTTTTACTTATTGCTTTTGGTGTGGTCTGCTTCTGTTTGGTGT  
TCGTTTAGGTTCTTTGGAGGTTAAGCTTACCCTTCTCATGTTCTTATAAGTCCGTTTTCAAGCTGTGCTGAAAACCTCAAGTCTCTCT  
CAACTGAACTAAGTCTGCTTGGTCTAAGAATGGGCTTACATTAAGATTGTCTCCCGCTAA

LexA-ER-VP64

ATGAAAGCGTTAACGGCCAGGCAACAAGAGGTGTTGATCTCATCCGTGATCAGCTACAGCCAGACAGGATGCGCCGACGCGTGGCG  
AAATCGCGCAGCGTTTGGGGTTCGTTCCCAAAACGCGGCTGAAGAACATCTGAAGGCGCTGGCACGCAAAAGCGTTATTGAAATGTT  
TTCCGGCGCATACCGCGGATTCTGCTGTTGCAAGAAAGGAAAGAGGGTTGCGCTGTTAGGCTGTGGCTGCGGTAACACAGCT  
CTGGCGCAACAGCATATTGAAGTCAATATCAGGTCGATCTTCTTATTCAAGCCGAATGCTGATTCTGCTGCGCGTCAGCGGGAT  
GTCGATGAAAGATATCGGCATTATGGATGGTACTTGTGGCAGTGCATAAAAACCTCAGGATGACGTAACGGCTCAGGCTGTTGCGCA  
CGTATTGATGACGAAGTTACCGTTAAGCGCTGAAAACACAGGGCAATAAAGTGAAGCTGTTGCGAGAAAATAGCGAGTTTAAACCAA  
TTGCTGTTGACCTCTGTCAGCAGAGCTTCAACATGAAGGGTGGCGGTTGGGTTATTGCAACGGGACTGGCTGTACTGCTGGA  
GACATGAGAGCTGCAACCTTTGGCCAAGCCGCTCATGATCAAAACGCTTAAAGAAGAAGCAGCTGGCTGCTGCTGCTGCTGCTGGA  
AGATGGTCAGTGCCTTGTGGATGCTGAGCCCCATACTTATTCGAGTATGATCTACAGACCTTCAAGGAGCAGGATGATGATG  
GGTTACTGACCAACCTGGCAGACAGGGAGTGGTTACATGATCAACTGGGCAAGAGGGTGGCAGGCTTGTGGATTGACCTCC  
ATGATCAGGTCACCTTCTAGAATGCTGGCTGAGAGTCTGATGATTGGTCTGCTTGGCGTCAAGGAGCAGGATGAAACCAA  
CTGTTGCTCTAACTTGTCTTGGACAGGAACAGGGAAAATGTTAGAGGGCATGTTGGAGATCTTGCAGATGCTGCTGGCTACATC  
ATCTCGGTTCCGATGATGAATCTGACAGGAGAGGAGTTTGTGTGCTCAAACTATTATTTGCTTAAATCTGGAAGTGTACACATTTCT  
GTCCAGCACCTGAAAGTCTTGGAAAGAAAGGACCATATCCACCGAGTCTGGCAAGATCACAGACCTTCAAGGAGCAGGATGAGCC  
AAGGAGGCTGACCTGACGACGACGACACAGCGGCTGGCCAGCTCTCTCTCCACATAGGACATGAGTAAACAAAG  
GCATGGAGCATCTGTACAGCATGAAGTGAAGAACGTTGGTCCCTTATGACCTGCTGTTGGAGATGCTGGACCCCAACCGCTACA  
TGCCGCCACTAGCCGTTGGAGGGGCTCCGTTGGAGGAGACGGACAAAGCCACTTGGCCACTGCGGGCTTACTTCACTCGGACCGCTG  
GACGATTTCGATCTCGACATGCTGGTCTGATGCCCTGATGACTTTGACCTGGATATGTTGGGAAGCGCAGCAATTGATGACTTTGA  
TCTGGACATGCTCGGCTCCGATGCTTGGACGATTTCGATCTCGATATGTTAAGCTT

LexA-ER-mDR521\_805

ATGAAAGCGTTAACGGCCAGGCAACAAGAGGTGTTGATCTCATCCGTGATCAGCTACAGCCAGACAGGATGCGCCGACGCGTGGCG  
AAATCGCGCAGCGTTTGGGGTTCGTTCCCAAAACGCGGCTGAAGAACATCTGAAGGCGCTGGCACGCAAAAGCGTTATTGAAATGTT  
TTCCGGCGCATACCGCGGATTCTGCTGTTGCAAGAAAGGAAAGAGGGTTGCGCTGTTAGGCTGTGGCTGCGGTAACACAGCT  
CTGGCGCAACAGCATATTGAAGTCAATATCAGGTCGATCTTCTTATTCAAGCCGAATGCTGATTCTGCTGCGCGTCAGCGGGAT  
GTCGATGAAAGATATCGGCATTATGGATGGTACTTGTGGCAGTGCATAAAAACCTCAGGATGACGTAACGGCTCAGGCTGTTGCGCA  
CGTATTGATGACGAAGTTACCGTTAAGCGCTGAAAACACAGGGCAATAAAGTGAAGCTGTTGCGAGAAAATAGCGAGTTTAAACCAA  
TTGCTGTTGACCTCTGTCAGCAGAGCTTCAACATGAAGGGTGGCGGTTGGGTTATTGCAACGGGACTGGCTGTACTGCTGGA  
GACATGAGAGCTGCAACCTTTGGCCAAGCCGCTCATGATCAAAACGCTTAAAGAAGAAGCAGCTGGCTTGTCCCTGACGGCCGAC  
AGATGGTCAGTGCCTTGTGGATGCTGAGCCCCATACTTATTCGAGTATGATCTACAGACCTTCAAGGAGCAGGATGATGATG  
GGTTACTGACCAACCTGGCAGACAGGGAGTGGTTACATGATCAACTGGGCAAGAGGGTGGCAGGCTTGTGGATTGACCTCC  
ATGATCAGGTCACCTTCTAGAATGCTGGCTAGAGATCTGATGATTGGTCTGCTTGGCGCTCCATGGAGACCCAGTGAAGTCA  
CTGTTTGTCTAACTTGTCTTGGACAGGAACAGGGAAAATGTTAGAGGGCATGTTGGAGATCTTGCAGATCTTCCGATGCTGCTGCA  
ATCTCGGTTCCGATGATGAATCTGACAGGAGAGGAGTTTGTGTGCTCAAACTATTATTTGCTTAAATCTGGAAGTGTACACATTTCT  
GTCCAGCACCTGAAAGTCTGGAAGAGAAGGACCATATCCACCGAGTCTGGCAAGATCACAGACCTTGTATCCACCTGATGGCC  
AAGGAGGCTGACCTGACGACGACGACACAGCGGCTGGCCAGCTCTCTCTCCACATAGGACATGAGTAAACAAAG  
GCATGGAGCATCTGTACAGCATGAAGTGAAGAACGTTGGTCCCTTATGACCTGCTGTTGGAGATGCTGGACCCCAACCGCTACA  
TGCCGCCACTAGCCGTTGGAGGGGCTCCGTTGGAGGAGACGGACAAAGCCACTTGGCCACTGCGGGCTTACTTCACTCGAAATGTTT  
CCAGACAACAAGAACAACGACTTGTACTTATCATGAGAAACTTGGGTATCGACTTCAAGACATCAGATCTATGAAAACGAAAGAA  
TTTTAGAACTGACTTACTGCTGCTGGTGAAGTTGACTTCAAGGACATCGACATCACTGACGAAATCTTGACTTACGTTCAAGACTCT  
TTGAACAACCTACTTGTGAACTGCTTGTGAACAACAACAGGTTACTCAACACTTGTCTTGTATGTTGCAAGAAGATTGCAATG  
GAACAACAACAATTGCAACAACCAACCAAGCTTTGGAACCAACAACAATAATGTTCAAAATGGTTTGTCCACAACAAGACT  
TGGGTCCAAAGCACACTCAAATCAACGGTACTTTCCGCTTCTTGAACCCAACTCCACAGTTTCTTTCACTGCTCCACAACAAGAAATG  
AAGCACTACCAATTTCTTCTTTTGAAGGACTGCTCAAGAATTTCCATAAGCCAGAAGTGTACTGTTCCATACACTCAAAA  
CTTCGCTCAATGAAACCAACTTGTGGCAGAACACTTAAAGTCTGTTCAATGGACTTCCAGGTGAGACTTCAAGCACTTTTGGCA  
CCAACTACTTCAACTGGACTTCGTTCTTGTGCAAGTTCAGAAAACCAATCTACGGTATCAACTTCAATCTGCTATGGTTTC  
TCCACAAGCTTACTACGCTGGTGTATGCTATGTAACCAATGTCAACAGGTTCCAAAAGAAGCTCCAGTTGACCAAACTCAACTCTT  
CTGAAATCCAGGTTCTCAAGCTTTCTGCTAAGGTTCAACTTAA

LexA-ER-B42

ATGAAAGCGTTAACGGCCAGGCAACAAGAGGTGTTGATCTCATCCGTGATCAGCTACAGCCAGACAGGATGCGCCGACGCGTGGCG  
AAATCGCGCAGCGTTTGGGGTTCGTTCCCAAAACGCGGCTGAAGAACATCTGAAGGCGCTGGCACGCAAAAGCGTTATTGAAATGTT  
TTCCGGCGCATACCGCGGATTCTGCTGTTGCAAGAAAGGAAAGAGGGTTGCGCTGTTAGGCTGTGGCTGCGGTAACACAGCT  
CTGGCGCAACAGCATATTGAAGTCAATATCAGGTCGATCTTCTTATTCAAGCCGAATGCTGATTCTGCTGCGCGTCAGCGGGAT  
GTCGATGAAAGATATCGGCATTATGGATGGTACTTGTGGCAGTGCATAAAAACCTCAGGATGACGTAACGGCTCAGGCTGTTGCGCA  
CGTATTGATGACGAAGTTACCGTTAAGCGCTGAAAACACAGGGCAATAAAGTGAAGCTGTTGCGAGAAAATAGCGAGTTTAAACCAA  
TTGCTGTTGACCTCTGTCAGCAGAGCTTCAACATGAAGGGTGGCGGTTGGGTTATTGCAACGGGACTGGCTGTACTGCTGGA



|       |                                                                                                                                                                                                                                                                                                                                                                                                                                                                                                                                                                                                                                                                                                                                                                                                                                                                                                                                                                                                                                                                                                                                                                                    |
|-------|------------------------------------------------------------------------------------------------------------------------------------------------------------------------------------------------------------------------------------------------------------------------------------------------------------------------------------------------------------------------------------------------------------------------------------------------------------------------------------------------------------------------------------------------------------------------------------------------------------------------------------------------------------------------------------------------------------------------------------------------------------------------------------------------------------------------------------------------------------------------------------------------------------------------------------------------------------------------------------------------------------------------------------------------------------------------------------------------------------------------------------------------------------------------------------|
|       | GACATGAGAGCTGCCAACCTTTGGCCAAGCCCGCTCATGATCAAACGCTCTAAGAAGAACAGCCTGGCCCTGTCCCTGACGGCCGACC<br>AGATGGTCAGTGCCTTGTGGATGCTGAGCCCCCATACTCTATTCCGAGTATGATCTACCAGACCCTCAGTGAAGCTTCGATGATG<br>GGCTTACTGACCAACCTGGCAGACAGGGAGCTGGTTCACATGATCAACTGGCCGGAAGAGGGTGCCAGGCTTTGGGATTTGACCCCTCC<br>ATGATCAGGTCCACCTTCTAGAATGTGCTGGCTAGAGATCCTGATGATGGTCTCGTCTGGCCGCTCCATGGAGACCCAGTGAAGCTA<br>CTGTTTGTCTCTAACTTGTCTTTGGACAGGAACCCAGGGAAAATGTGTAGAGGGCATGGTGGAGATCTTCGACATGCTGGCTACATC<br>ATCTCGGTTCCGCATGATGAATCTGCAGGGAGAGGAGTGTGTGTCCTCAAATCTATTATTTTGTCTAAATCTGGAGTGTACACATTTCT<br>GTCCAGCACCTGAACTCTGGAAGAGAAGGACATATCCACCGAGTCTGGACAAGATCAGACACACTTTGATCCACCTGATGGCC<br>AAGGCAGGCCTGACCTGCAGCAGCAGCAGCAGCCAGGGCTGGCCAGCTCTCTCTATCCTCTCCACATCAGGCACATGAGTAACAAAAG<br>GCATGGAGCATCTGTACAGCATGAAGTGCAAGAAGCTGGTCCCTCTATGACCTGCTGGAGATGCTGGACGCCACCCAGCTACA<br>TGGCCCCACTAGCCGTGGAGGGCATCCGTGGAGGAGACGGACCAAAGCCACTGGCCACTCGGGGCTCTACTCATCGATCAATAAA<br>GATATCGAGGAGTGAATGCCATCATGAGCAGTTTATCGACTACCTGCGCACCCGACAGGAGATGCCGATGGAAATGGCCGGATCAGG<br>CGATTAACGTGGTCCGGGCATGACGCCGAAAACCATTTCTACGCGGGCCCGGATCCAGCTGACTGGCTGAAATCGAATGGTTT<br>TCATGAAATGAAGCGGATGTTAACGATACCAGCTCTTGTGAGTGGAGATTAAGCTT |
| yEGFP | ATGCTCAAAGGTGAAGAATATTACTGGTGTGTCCCAATTTGGTGAATTAGATGGTGTGTAATGGTCACAAAATTTCTGTCTCC<br>GGTGAAGGTGAAGGTGATGCTACTTACCGTAAATTTGACCTTAAAATTTATTTGACTACTGGTAAATGGCAGTCCATGGCCAACCTT<br>AGTCACTACTTTCCGGTATGGTGTCAAATGTTTTCGAGATACCCAGATCATATGAAACAACATGACTTTTCAAGTCTGCCATGCCAG<br>AAGGTTATGTTCAAGAAAGAACTATTTTTTCAAAGATGACGGTAACTCAAAGCCAGAGCTGAAGTCAAGTTGAAGGTGATACCTT<br>AGTTAATAGAATCGAATTAAGGATTTGATTTTAAAGAAGATGGTAACATTTTAGGTCACAAATTTGGAATAACAATAACTCTCAC<br>AATGTTTACATCATGGCTGACAAACAAAAGAATGGTATCAAAGTTAACTTCAAATTTAGACACAACATTTGAAGATGGTTCTGTCAAT<br>AGTGGACATTATCAACAAAATACTCCAATGGTGTGGTCCAGTCTTGTACAGACAACCAATTAATCACTCAATCTGCCTATC<br>CAAAGATCCAAACGAAAAGAGGACCACATGGTCTTGTAGAAATTTGTTACTGCTGCTGGTATTACCCATGGTATGGATGAATTTGACA<br>AATAA                                                                                                                                                                                                                                                                                                                                                                                                                                  |

**Table S5.** Terminator sequences.

| DNA fragments | Sequence                                                                                                                                                                                                                                                           |
|---------------|--------------------------------------------------------------------------------------------------------------------------------------------------------------------------------------------------------------------------------------------------------------------|
| CYC1t         | CATGTAATAGTATTATGTCACGCTTACATTACGCCCCTCCCCACATCCGCTCTAACCGAAAAGGAAGGAGTTAGACAACCTGAAGTCTAGGT<br>CCCTATTTATTTTTATAGTTATGTTAGTATTAAGAAGCTTATTTATATTTCAAATTTTCTTTTTTCTGTACAGACGCGTGTACCGCATGTA<br>ACATTATACTGAAAACCTTGCTTGAGAAGGTTTTGGGACGCTCGAAGGCTTTAATTTGCAAGCT    |
| CYC1t_ATC     | CATGTAATAGTATTATGTCACGCTTACATTACGCCCCTCCCCACATCCGCTCTAACCGAAAAGGAAGGAGTTAGACAACCTGAAGTCTAGGT<br>CCCTATTTATTTTTATAGTTATGTTAGTATTAAGAAGCTTATTTATATTTCAAATTTTCTTTTTTCTGTACAGACGCGTGTACCGCATGTA<br>ACATTATACTGAAAACCTTGCTTGAGAAGGTTTTGGGACGCTCGAAGGCTTTAATTTGCAAGCTATC |
| Tsynth24      | TGGGTGGTATGTTATATACTGTCTAGAAATAAAGATATCATCTTTCAAA                                                                                                                                                                                                                  |
| Tsynth6       | TATATAATTAATAAAGAGTATCATCTTTCAAA                                                                                                                                                                                                                                   |

**Table S6.** Yeast strains engineered in this work.

| Strain name | Strain genotype                                                         |
|-------------|-------------------------------------------------------------------------|
| byMM2       | FY1679-08A (MATa; ura3-52; leu2Δ1; trp1Δ63; his3Δ200; GAL2)             |
| byMM584     | CEN.PK2-1C (MATa; his3D1; leu2-3_112; ura3-52; trp1-289; MAL2-8c; SUC2) |
| byMM109     | byMM2 pMM220::URA3 pMM197::LEU2                                         |
| byMM125     | byMM2 pMM220::URA3 pMM229::LEU2                                         |
| byMM381     | byMM2 pMM527::URA3 pMM363::LEU2                                         |
| byMM617     | byMM584 pMM802::URA3 pMM403::LEU2                                       |
| byMM635     | byMM584 pMM802::URA3 pMM197::LEU2                                       |
| byMM644     | byMM584 pMM802::URA3 pMM555::LEU2                                       |
| byMM667     | byMM584 pMM802::URA3 pMM363::LEU2                                       |
| byMM888     | byMM584 pMM857::URA3 pMM363::LEU2                                       |
| byMM889     | byMM584 pMM857::URA3 pMM403::LEU2                                       |
| byMM890     | byMM584 pMM858::URA3 pMM363::LEU2                                       |
| byMM892     | byMM584 pMM858::URA3 pMM403::LEU2                                       |
| byMM1449    | byMM584 pMM1215::URA3 pMM363::LEU2                                      |
| byMM1480    | byMM584 pMM1215::URA3 pMM403::LEU2                                      |
| byMM1450    | byMM584 pMM1201::URA3 pMM363::LEU2                                      |
| byMM1481    | byMM584 pMM1201::URA3 pMM403::LEU2                                      |
| byMM1451    | byMM584 pMM1216::URA3 pMM363::LEU2                                      |
| byMM1482    | byMM584 pMM1216::URA3 pMM403::LEU2                                      |
| byMM1452    | byMM584 pMM1209::URA3 pMM363::LEU2                                      |
| byMM1483    | byMM584 pMM1209::URA3 pMM403::LEU2                                      |
| byMM1453    | byMM584 pMM1323::URA3 pMM363::LEU2                                      |
| byMM1484    | byMM584 pMM1323::URA3 pMM403::LEU2                                      |
| byMM1454    | byMM584 pMM1324::URA3 pMM363::LEU2                                      |
| byMM1485    | byMM584 pMM1324::URA3 pMM403::LEU2                                      |
| byMM1847    | byMM584 pMM1549::URA3 pMM363::LEU2                                      |
| byMM1848    | byMM584 pMM1549::URA3 pMM403::LEU2                                      |
| byMM1904    | byMM584 pMM1551::URA3 pMM363::LEU2                                      |
| byMM1905    | byMM584 pMM1551::URA3 pMM403::LEU2                                      |
| byMM1973    | byMM584 pMM1607::URA3 pMM363::LEU2                                      |
| byMM1974    | byMM584 pMM1607::URA3 pMM403::LEU2                                      |
| byMM1982    | byMM584 pMM1612::URA3 pMM363::LEU2                                      |
| byMM1983    | byMM584 pMM1612::URA3 pMM403::LEU2                                      |
| byMM1984    | byMM584 pMM1613::URA3 pMM363::LEU2                                      |
| byMM1985    | byMM584 pMM1613::URA3 pMM403::LEU2                                      |
| byMM1709    | byMM584 pMM1540::URA3                                                   |
| byMM1710    | byMM584 pMM1541::URA3 pMM1541::LEU2                                     |
| byMM1711    | byMM584 pMM1542::URA3 pMM1542::LEU2                                     |
| byMM1712    | byMM584 pMM1543::URA3 pMM1543::LEU2                                     |
| byMM1713    | byMM584 pMM1544::URA3 pMM1544::LEU2                                     |
| byMM1894    | byMM2 pMM527::URA3 pMM363::LEU2 pMM1594::HIS3                           |
| byMM1906    | byMM2 pMM527::URA3 pMM363::LEU2 pMM1594::HIS3 pMM1595::TRP1             |

|          |                                                             |
|----------|-------------------------------------------------------------|
| byMM1979 | byMM2 pMM220::URA3 pMM197::LEU2 pMM1594::HIS3 pMM1595::TRP1 |
| byMM1987 | byMM2 pMM220::URA3 pMM229::LEU2 pMM1594::HIS3 pMM1595::TRP1 |

**Table S7.** OD<sub>600</sub> data for growth curve.

| Sample name      | OD (first measurement) | OD (second measurement) | OD (third measurement) | Mean   | Standard deviation |
|------------------|------------------------|-------------------------|------------------------|--------|--------------------|
| byMM1712-0 hour  | 0.0432                 | 0.0412                  | 0.0395                 | 0.0413 | 0.0015             |
| byMM1712-7 hour  | 0.5364                 | 0.5836                  | 0.5186                 | 0.5462 | 0.0274             |
| byMM1712-14 hour | 4.9641                 | 5.2764                  | 5.1097                 | 5.1167 | 0.1276             |
| byMM1712-21 hour | 8.3328                 | 8.7875                  | 8.0469                 | 8.3891 | 0.3050             |
| byMM1712-28 hour | 9.3056                 | 9.8765                  | 9.1342                 | 9.4388 | 0.3173             |

**Table S8.** *S. cerevisiae* biosensor library based on short lex operator. “Max fl.” stands for maximum fluorescence—A.U. means arbitrary units; “Conc. at Max fl.” is the concentration of  $\beta$ -estradiol at which the maximum fluorescence was reached; “% pGPD” is the ratio between the maximum fluorescence and that of the strong *GPD* promoter (18390.48 A.U.); “Basal fl.” is the basal fluorescence, i.e., the fluorescence measured in the absence of  $\beta$ -estradiol; “Max fl. /Basal fl.” is the ON/OFF ratio; “LOD” is the limit of detection, i.e., the lowest  $\beta$ -estradiol concentration that is statistically significantly different from and at least two-fold higher than the basal fluorescence; “Tolerance” is the maximal  $\beta$ -estradiol concentration that induces proper fluorescence expression without toxicity effects (the concentration interval between LOD and Tolerance represents the detection range); n is the Hill coefficient; EC50 is the half-maximal effective concentration of  $\beta$ -estradiol, i.e., the concentration of  $\beta$ -estradiol at which the fluorescence output is equal to one half of the maximal (steady-state) fluorescence. n and EC50 were obtained from the linearized empirical Hill functions in Table S9.

| Strain   | Receptor               | Reporter                           | Max fl. (A.U.) | Conc. at Max fl. (nM) | % pGPD  | Basal fl. (A.U.) | Max fl. /Basal fl. | LOD (nM) | Tolerance (nM) | n    | EC50 (nM) |
|----------|------------------------|------------------------------------|----------------|-----------------------|---------|------------------|--------------------|----------|----------------|------|-----------|
| byMM617  | pGPD-B42               | lexOpR(40-TATA)_pCYC1min           | 3189.26        | 1000                  | 17.34%  | 1013.45          | 3.15               | 500      | 2000           | 1.54 | 223.25    |
| byMM635  | pGPD-VP64              | lexOpR(40-TATA)_pCYC1min           | 5525.92        | 15.6                  | 30.05%  | 2441.99          | 2.26               | 15.6     | 31.25          | 1.33 | 7.24      |
| byMM644  | pCMV-VP64              | lexOpR(40-TATA)_pCYC1min           | 1868.25        | 1000                  | 10.16%  | 1210.18          | 1.54               | -        | -              | 1.00 | 72.46     |
| byMM667  | DEG1t_pCYC1noTATA-VP64 | lexOpR(40-TATA)_pCYC1min           | 2686.88        | 250                   | 14.61%  | 1151.80          | 2.33               | 125      | 2000           | 1.32 | 23.53     |
| byMM1847 | DEG1t_pCYC1noTATA-VP64 | lexOpL(20-TATA)_pCYC1min           | 1262.79        | 1000                  | 6.87%   | 503.46           | 2.51               | 62.5     | 2000           | 1.19 | 26.33     |
| byMM1449 | DEG1t_pCYC1noTATA-VP64 | lexOpL(40-TATA)_pCYC1min           | 2828.21        | 500                   | 15.38%  | 1195.68          | 2.37               | 62.5     | 2000           | 1.34 | 24.99     |
| byMM1904 | DEG1t_pCYC1noTATA-VP64 | lexOpL(60-TATA)_pCYC1min           | 4607.45        | 250                   | 25.05%  | 1447.73          | 3.18               | 15.6     | 2000           | 1.37 | 11.79     |
| byMM1453 | DEG1t_pCYC1noTATA-VP64 | lex2Op(40-TATA)_pCYC1min           | 5040.43        | 250                   | 27.41%  | 1380.96          | 3.65               | 7.8      | 1000           | 1.00 | 9.20      |
| byMM1450 | DEG1t_pCYC1noTATA-VP64 | lexOpR(1)lexOpL(40-TATA)_pCYC1min  | 5082.48        | 1000                  | 27.64%  | 1162.50          | 4.37               | 15.6     | 2000           | 1.02 | 24.31     |
| byMM1454 | DEG1t_pCYC1noTATA-VP64 | lexOpR(20)lexOpL(40-TATA)_pCYC1min | 3055.83        | 500                   | 16.62%  | 1135.17          | 2.69               | 31.25    | 2000           | 1.05 | 17.72     |
| byMM888  | DEG1t_pCYC1noTATA-VP64 | 2lexOpR(1,40-TATA)_pCYC1min        | 2352.42        | 500                   | 12.79%  | 786.69           | 2.99               | 62.5     | 2000           | 1.64 | 32.03     |
| byMM1451 | DEG1t_pCYC1noTATA-VP64 | 2lexOpL(1,40-TATA)_pCYC1min        | 5078.57        | 2000                  | 27.62%  | 1169.79          | 4.34               | 15.6     | 2000           | 1.45 | 17.80     |
| byMM890  | DEG1t_pCYC1noTATA-VP64 | 2lexOpR(20,40-TATA)_pCYC1min       | 4691.35        | 125                   | 25.51%  | 1286.57          | 3.65               | 15.6     | 2000           | 1.37 | 14.23     |
| byMM1452 | DEG1t_pCYC1noTATA-VP64 | 2lexOpL(20,40-TATA)_pCYC1min       | 5088.86        | 250                   | 27.67%  | 1044.01          | 4.87               | 15.6     | 2000           | 1.33 | 16.63     |
| byMM1973 | DEG1t_pCYC1noTATA-VP64 | 2lexOpL(40,40-TATA)_pCYC1min       | 4042.06        | 2000                  | 21.98%  | 917.75           | 4.40               | 62.5     | 2000           | 1.05 | 96.78     |
| byMM1982 | DEG1t_pCYC1noTATA-VP64 | 4lexOpL(1,60-TATA)_pCYC1min        | 8449.45        | 2000                  | 45.94%  | 655.81           | 12.88              | 7.8      | 2000           | 1.32 | 38.13     |
| byMM1984 | DEG1t_pCYC1noTATA-VP64 | 8lexOpL(1,60-TATA)_pCYC1min        | 25488.84       | 500                   | 138.60% | 553.91           | 46.02              | 1.9      | 2000           | 1.37 | 19.84     |
| byMM1484 | pGPD-B42               | lex2Op(40-TATA)_pCYC1min           | 4479.33        | 1000                  | 24.36%  | 506.67           | 8.84               | 62.5     | 2000           | 1.39 | 169.29    |
| byMM1481 | pGPD-B42               | lexOpR(1)lexOpL(40-TATA)_pCYC1min  | 4215.73        | 1000                  | 22.92%  | 633.41           | 6.66               | 125      | 2000           | 1.33 | 232.55    |
| byMM1485 | pGPD-B42               | lexOpR(20)lexOpL(40-TATA)_pCYC1min | 4364.54        | 1000                  | 23.73%  | 457.75           | 9.53               | 125      | 2000           | 1.36 | 291.64    |
| byMM1848 | pGPD-B42               | lexOpL(20-TATA)_pCYC1min           | 4313.59        | 250                   | 23.46%  | 905.94           | 4.76               | 62.5     | 500            | 0.87 | 189.70    |
| byMM1480 | pGPD-B42               | lexOpL(40-TATA)_pCYC1min           | 2533.58        | 500                   | 13.78%  | 964.74           | 2.63               | 500      | 1000           | 1.17 | 393.95    |
| byMM1905 | pGPD-B42               | lexOpL(60-TATA)_pCYC1min           | 4248.42        | 250                   | 23.10%  | 1076.35          | 3.95               | 62.5     | 500            | 1.26 | 57.73     |
| byMM889  | pGPD-B42               | 2lexOpR(1,40-TATA)_pCYC1min        | 3131.58        | 1000                  | 17.03%  | 769.07           | 4.07               | 250      | 2000           | 1.30 | 358.66    |
| byMM1482 | pGPD-B42               | 2lexOpL(1,40-TATA)_pCYC1min        | 4514.64        | 1000                  | 24.55%  | 662.26           | 6.82               | 125      | 2000           | 1.47 | 291.17    |
| byMM892  | pGPD-B42               | 2lexOpR(20,40-TATA)_pCYC1min       | 3982.74        | 1000                  | 21.66%  | 806.14           | 4.94               | 125      | 2000           | 1.22 | 206.19    |
| byMM1483 | pGPD-B42               | 2lexOpL(20,40-TATA)_pCYC1min       | 4809.83        | 1000                  | 26.15%  | 505.04           | 9.52               | 125      | 2000           | 1.32 | 312.16    |
| byMM1974 | pGPD-B42               | 2lexOpL(40,40-TATA)_pCYC1min       | 2498.98        | 2000                  | 13.59%  | 312.91           | 7.99               | 125      | 2000           | 1.38 | 338.72    |
| byMM1983 | pGPD-B42               | 4lexOpL(1,60-TATA)_pCYC1min        | 6610.81        | 500                   | 35.95%  | 59.29            | 111.50             | 15.6     | 2000           | 2.01 | 140.65    |
| byMM1985 | pGPD-B42               | 8lexOpL(1,60-TATA)_pCYC1min        | 15723.06       | 1000                  | 85.50%  | 54.58            | 288.07             | 31.25    | 2000           | 2.57 | 155.51    |

**Table S9.** Linearized empirical Hill functions—and corresponding  $R^2$ —describing the relation between input ( $\beta$ -estradiol concentration) and output (fluorescence) for each *S. cerevisiae* biosensor in our library. The empirical linearized Hill function is:  $y = -n x + \log_{10}(EC50)$ , where  $y = \log_{10}((F_{max}-F)/(F-F_{basal}))$  and  $x = \log_{10}(\beta\text{-estradiol concentration})$ . n is the Hill cooperativity coefficient, EC50 the half-maximal effective concentration of  $\beta$ -estradiol,  $F_{max}$  the maximum fluorescence,  $F_{basal}$  the basal fluorescence, F the fluorescence measured at any given concentration of  $\beta$ -estradiol concentration, and  $R^2$  the goodness of the fit.

| Strain   | Receptor               | Reporter                           | Function                | R <sup>2</sup> |
|----------|------------------------|------------------------------------|-------------------------|----------------|
| byMM617  | pGPD-B42               | lexOpR(40-TATA)_pCYC1min           | $y = -1.537x + 3.6101$  | 0.9920         |
| byMM635  | pGPD-VP64              | lexOpR(40-TATA)_pCYC1min           | $y = -1.3263x + 1.1399$ | 0.9944         |
| byMM644  | pCMV-VP64              | lexOpR(40-TATA)_pCYC1min           | $y = -1.0048x + 1.869$  | 0.9625         |
| byMM667  | DEG1t_pCYC1noTATA-VP64 | lexOpR(40-TATA)_pCYC1min           | $y = -1.3165x + 1.8058$ | 0.9742         |
| byMM888  | DEG1t_pCYC1noTATA-VP64 | 2lexOpR(1,40-TATA)_pCYC1min        | $y = -1.6431x + 2.4737$ | 0.9893         |
| byMM889  | pGPD-B42               | 2lexOpR(1,40-TATA)_pCYC1min        | $y = -1.2966x + 3.3124$ | 0.9816         |
| byMM890  | DEG1t_pCYC1noTATA-VP64 | 2lexOpR(20,40-TATA)_pCYC1min       | $y = -1.3719x + 1.582$  | 0.9972         |
| byMM892  | pGPD-B42               | 2lexOpR(20,40-TATA)_pCYC1min       | $y = -1.2222x + 2.8285$ | 0.9884         |
| byMM1449 | DEG1t_pCYC1noTATA-VP64 | lexOpL(40-TATA)_pCYC1min           | $y = -1.3392x + 1.8719$ | 0.9926         |
| byMM1450 | DEG1t_pCYC1noTATA-VP64 | lexOpR(1)lexOpL(40-TATA)_pCYC1min  | $y = -1.0171x + 1.4094$ | 0.9958         |
| byMM1451 | DEG1t_pCYC1noTATA-VP64 | 2lexOpL(1,40-TATA)_pCYC1min        | $y = -1.4454x + 1.8074$ | 0.9668         |
| byMM1452 | DEG1t_pCYC1noTATA-VP64 | 2lexOpL(20,40-TATA)_pCYC1min       | $y = -1.3261x + 1.6189$ | 0.9893         |
| byMM1453 | DEG1t_pCYC1noTATA-VP64 | lexOpL(1)lexOpR(40-TATA)_pCYC1min  | $y = -1.0023x + 0.9659$ | 0.9912         |
| byMM1454 | DEG1t_pCYC1noTATA-VP64 | lexOpR(20)lexOpL(40-TATA)_pCYC1min | $y = -1.0536x + 1.3154$ | 0.9926         |
| byMM1480 | pGPD-B42               | lexOpL(40-TATA)_pCYC1min           | $y = -1.1667x + 3.0281$ | 0.9909         |
| byMM1481 | pGPD-B42               | lexOpR(1)lexOpL(40-TATA)_pCYC1min  | $y = -1.3342x + 3.1574$ | 0.9869         |
| byMM1482 | pGPD-B42               | 2lexOpL(1,40-TATA)_pCYC1min        | $y = -1.4711x + 3.625$  | 0.9972         |
| byMM1483 | pGPD-B42               | 2lexOpL(20,40-TATA)_pCYC1min       | $y = -1.3164x + 3.2836$ | 0.9932         |
| byMM1484 | pGPD-B42               | lexOpL(1)lexOpR(40-TATA)_pCYC1min  | $y = -1.3926x + 3.1036$ | 0.9946         |
| byMM1485 | pGPD-B42               | lexOpR(20)lexOpL(40-TATA)_pCYC1min | $y = -1.3557x + 3.3416$ | 0.9993         |
| byMM1847 | DEG1t_pCYC1noTATA-VP64 | lexOpL(20-TATA)_pCYC1min           | $y = -1.187x + 1.6861$  | 0.9823         |
| byMM1848 | pGPD-B42               | lexOpL(20-TATA)_pCYC1min           | $y = -0.8714x + 1.9851$ | 0.9669         |
| byMM1904 | DEG1t_pCYC1noTATA-VP64 | lexOpL(60-TATA)_pCYC1min           | $y = -1.3694x + 1.4672$ | 0.9953         |
| byMM1905 | pGPD-B42               | lexOpL(60-TATA)_pCYC1min           | $y = -1.2617x + 2.2224$ | 0.9766         |
| byMM1973 | DEG1t_pCYC1noTATA-VP64 | 2lexOpL(40,40-TATA)_pCYC1min       | $y = -1.0484x + 2.0819$ | 0.9976         |
| byMM1974 | pGPD-B42               | 2lexOpL(40,40-TATA)_pCYC1min       | $y = -1.3759x + 3.4808$ | 0.9907         |
| byMM1982 | DEG1t_pCYC1noTATA-VP64 | 4lexOpL(1,60-TATA)_pCYC1min        | $y = -1.3193x + 2.0861$ | 0.9804         |
| byMM1983 | pGPD-B42               | 4lexOpL(1,60-TATA)_pCYC1min        | $y = -2.0118x + 4.3216$ | 0.9988         |
| byMM1984 | DEG1t_pCYC1noTATA-VP64 | 8lexOpL(1,60-TATA)_pCYC1min        | $y = -1.3703x + 1.7779$ | 0.9822         |
| byMM1985 | pGPD-B42               | 8lexOpL(1,60-TATA)_pCYC1min        | $y = -2.5698x + 5.6324$ | 0.9955         |

**Table S10.** Statistical analysis of the results in Figure S3A.

| Unpaired t test with Welch's correction                                           | Mean 1  | Mean 2  | SD1    | SD2    | n1 | n2 | P value | P value summary |
|-----------------------------------------------------------------------------------|---------|---------|--------|--------|----|----|---------|-----------------|
| lexOpR(40-TATA)_pCYC1min (0 nM, 1) vs. lexOpL(40-TATA)_pCYC1min (0 nM, 2)         | 1013.45 | 964.74  | 31.18  | 87.85  | 3  | 3  | 0.4441  | ns              |
| lexOpR(40-TATA)_pCYC1min (0.98 nM, 1) vs. lexOpL(40-TATA)_pCYC1min (0.98 nM, 2)   | 1012.79 | 978.96  | 35.15  | 32.33  | 3  | 3  | 0.2876  | ns              |
| lexOpR(40-TATA)_pCYC1min (1.95 nM, 1) vs. lexOpL(40-TATA)_pCYC1min (1.95 nM, 2)   | 1049.57 | 924.28  | 21.82  | 96.56  | 3  | 3  | 0.1478  | ns              |
| lexOpR(40-TATA)_pCYC1min (3.91 nM, 1) vs. lexOpL(40-TATA)_pCYC1min (3.91 nM, 2)   | 1053.07 | 949.38  | 1.95   | 56.25  | 3  | 3  | 0.0855  | ns              |
| lexOpR(40-TATA)_pCYC1min (7.81 nM, 1) vs. lexOpL(40-TATA)_pCYC1min (7.81 nM, 2)   | 1044.30 | 1020.22 | 14.38  | 87.06  | 3  | 3  | 0.6809  | ns              |
| lexOpR(40-TATA)_pCYC1min (15.63 nM, 1) vs. lexOpL(40-TATA)_pCYC1min (15.63 nM, 2) | 1063.28 | 943.56  | 19.68  | 46.66  | 3  | 3  | 0.0324  | *               |
| lexOpR(40-TATA)_pCYC1min (31.25 nM, 1) vs. lexOpL(40-TATA)_pCYC1min (31.25 nM, 2) | 1107.17 | 1105.12 | 37.15  | 16.31  | 3  | 3  | 0.9363  | ns              |
| lexOpR(40-TATA)_pCYC1min (62.5 nM, 1) vs. lexOpL(40-TATA)_pCYC1min (62.5 nM, 2)   | 1255.97 | 1094.09 | 25.79  | 99.86  | 3  | 3  | 0.0987  | ns              |
| lexOpR(40-TATA)_pCYC1min (125 nM, 1) vs. lexOpL(40-TATA)_pCYC1min (125 nM, 2)     | 1513.08 | 1389.59 | 34.28  | 191.96 | 3  | 3  | 0.3812  | ns              |
| lexOpR(40-TATA)_pCYC1min (250 nM, 1) vs. lexOpL(40-TATA)_pCYC1min (250 nM, 2)     | 1834.51 | 1890.47 | 44.82  | 25.28  | 3  | 3  | 0.1516  | ns              |
| lexOpR(40-TATA)_pCYC1min (500 nM, 1) vs. lexOpL(40-TATA)_pCYC1min (500 nM, 2)     | 2155.35 | 2533.58 | 108.56 | 230.66 | 3  | 3  | 0.0870  | ns              |
| lexOpR(40-TATA)_pCYC1min (1000 nM, 1) vs. lexOpL(40-TATA)_pCYC1min (1000 nM, 2)   | 3189.26 | 2111.53 | 411.29 | 233.81 | 3  | 3  | 0.0262  | *               |
| lexOpR(40-TATA)_pCYC1min (2000 nM, 1) vs. lexOpL(40-TATA)_pCYC1min (2000 nM, 2)   | 3128.59 | 1765.47 | 508.62 | 385.65 | 3  | 3  | 0.0236  | *               |

**Table S11.** Statistical analysis of the results in Figure S3B.

| Unpaired t test with Welch's correction                                                   | Mean 1 | Mean 2 | SD1   | SD2   | n1 | n2 | P value | P value summary |
|-------------------------------------------------------------------------------------------|--------|--------|-------|-------|----|----|---------|-----------------|
| 2lexOpR(1, 40-TATA)_pCYC1min (0 nM, 1) vs. 2lexOpL(1, 40-TATA)_pCYC1min (0 nM, 2)         | 769.07 | 662.26 | 34.47 | 34.53 | 3  | 3  | 0.0192  | *               |
| 2lexOpR(1, 40-TATA)_pCYC1min (0.98 nM, 1) vs. 2lexOpL(1, 40-TATA)_pCYC1min (0.98 nM, 2)   | 745.91 | 647.04 | 31.52 | 25.78 | 3  | 3  | 0.0148  | *               |
| 2lexOpR(1, 40-TATA)_pCYC1min (1.95 nM, 1) vs. 2lexOpL(1, 40-TATA)_pCYC1min (1.95 nM, 2)   | 772.10 | 651.76 | 26.08 | 28.56 | 3  | 3  | 0.0059  | **              |
| 2lexOpR(1, 40-TATA)_pCYC1min (3.91 nM, 1) vs. 2lexOpL(1, 40-TATA)_pCYC1min (3.91 nM, 2)   | 752.06 | 634.92 | 42.29 | 22.03 | 3  | 3  | 0.0236  | *               |
| 2lexOpR(1, 40-TATA)_pCYC1min (7.81 nM, 1) vs. 2lexOpL(1, 40-TATA)_pCYC1min (7.81 nM, 2)   | 791.58 | 649.97 | 59.83 | 17.52 | 3  | 3  | 0.0454  | *               |
| 2lexOpR(1, 40-TATA)_pCYC1min (15.63 nM, 1) vs. 2lexOpL(1, 40-TATA)_pCYC1min (15.63 nM, 2) | 815.66 | 684.53 | 65.71 | 32.49 | 3  | 3  | 0.0552  | ns              |
| 2lexOpR(1, 40-TATA)_pCYC1min (31.25 nM, 1) vs. 2lexOpL(1, 40-TATA)_pCYC1min (31.25 nM, 2) | 822.97 | 789.55 | 37.61 | 11.48 | 3  | 3  | 0.2600  | ns              |

|                                                                                           |         |         |        |        |   |   |        |    |
|-------------------------------------------------------------------------------------------|---------|---------|--------|--------|---|---|--------|----|
| 2lexOpR(1, 40-TATA_pCYC1min (62.5 nM, 1) vs. 2lexOpL(1, 40-TATA_pCYC1min (62.5 nM, 2)     | 933.14  | 1051.29 | 70.02  | 93.26  | 3 | 3 | 0.1597 | ns |
| 2lexOpR(1, 40-TATA_pCYC1min (125 nM, 1) vs. 2lexOpL(1, 40-TATA_pCYC1min (125 nM, 2)       | 1195.22 | 1592.72 | 54.46  | 179.65 | 3 | 3 | 0.0517 | ns |
| 2lexOpR(1, 40-TATA_pCYC1min (250 nM, 1) vs. 2lexOpL(1, 40-TATA_pCYC1min (250 nM, 2)       | 1768.29 | 2316.81 | 94.55  | 184.58 | 3 | 3 | 0.0198 | *  |
| 2lexOpR(1, 40-TATA_pCYC1min (500 nM, 1) vs. 2lexOpL(1, 40-TATA_pCYC1min (500 nM, 2)       | 2383.22 | 3296.13 | 133.74 | 191.35 | 3 | 3 | 0.0037 | ** |
| 2lexOpR(1, 40-TATA_pCYC1min (1000 nM, 1) vs. 2lexOpL(1, 40-TATA_pCYC1min (1000 nM, 2)     | 3131.58 | 4514.64 | 723.75 | 617.48 | 3 | 3 | 0.0670 | ns |
| 2lexOpR(1, 40-TATA_pCYC1min (2000 nM, 1) vs. 2lexOpL(1, 40-TATA_pCYC1min (2000 nM, 2)     | 2315.46 | 3123.89 | 809.49 | 673.21 | 3 | 3 | 0.2565 | ns |
| 2lexOpR(20, 40-TATA_pCYC1min (0 nM, 1) vs. 2lexOpL(20, 40-TATA_pCYC1min (0 nM, 2)         | 806.14  | 505.04  | 62.08  | 143.98 | 3 | 3 | 0.0518 | ns |
| 2lexOpR(20, 40-TATA_pCYC1min (0.98 nM, 1) vs. 2lexOpL(20, 40-TATA_pCYC1min (0.98 nM, 2)   | 717.31  | 502.36  | 34.15  | 132.99 | 3 | 3 | 0.0993 | ns |
| 2lexOpR(20, 40-TATA_pCYC1min (1.95 nM, 1) vs. 2lexOpL(20, 40-TATA_pCYC1min (1.95 nM, 2)   | 726.27  | 504.09  | 26.06  | 112.50 | 3 | 3 | 0.0691 | ns |
| 2lexOpR(20, 40-TATA_pCYC1min (3.91 nM, 1) vs. 2lexOpL(20, 40-TATA_pCYC1min (3.91 nM, 2)   | 716.67  | 523.26  | 32.85  | 131.10 | 3 | 3 | 0.1175 | ns |
| 2lexOpR(20, 40-TATA_pCYC1min (7.81 nM, 1) vs. 2lexOpL(20, 40-TATA_pCYC1min (7.81 nM, 2)   | 793.26  | 530.02  | 0.95   | 147.18 | 3 | 3 | 0.0903 | ns |
| 2lexOpR(20, 40-TATA_pCYC1min (15.63 nM, 1) vs. 2lexOpL(20, 40-TATA_pCYC1min (15.63 nM, 2) | 836.05  | 572.46  | 37.58  | 120.64 | 3 | 3 | 0.0526 | ns |
| 2lexOpR(20, 40-TATA_pCYC1min (31.25 nM, 1) vs. 2lexOpL(20, 40-TATA_pCYC1min (31.25 nM, 2) | 964.85  | 717.78  | 43.82  | 122.12 | 3 | 3 | 0.0592 | ns |
| 2lexOpR(20, 40-TATA_pCYC1min (62.5 nM, 1) vs. 2lexOpL(20, 40-TATA_pCYC1min (62.5 nM, 2)   | 1381.46 | 977.96  | 53.83  | 138.35 | 3 | 3 | 0.0250 | *  |
| 2lexOpR(20, 40-TATA_pCYC1min (125 nM, 1) vs. 2lexOpL(20, 40-TATA_pCYC1min (125 nM, 2)     | 1917.54 | 1597.03 | 68.83  | 208.12 | 3 | 3 | 0.1048 | ns |
| 2lexOpR(20, 40-TATA_pCYC1min (250 nM, 1) vs. 2lexOpL(20, 40-TATA_pCYC1min (250 nM, 2)     | 2826.79 | 2304.19 | 124.40 | 221.51 | 3 | 3 | 0.0349 | *  |
| 2lexOpR(20, 40-TATA_pCYC1min (500 nM, 1) vs. 2lexOpL(20, 40-TATA_pCYC1min (500 nM, 2)     | 2915.99 | 3299.94 | 92.98  | 177.83 | 3 | 3 | 0.0449 | *  |
| 2lexOpR(20, 40-TATA_pCYC1min (1000 nM, 1) vs. 2lexOpL(20, 40-TATA_pCYC1min (1000 nM, 2)   | 3982.74 | 4809.83 | 242.04 | 524.00 | 3 | 3 | 0.0946 | ns |
| 2lexOpR(20, 40-TATA_pCYC1min (2000 nM, 1) vs. 2lexOpL(20, 40-TATA_pCYC1min (2000 nM, 2)   | 2937.46 | 3421.48 | 943.50 | 744.52 | 3 | 3 | 0.5258 | ns |

**Table S12.** Statistical analysis of the results in Figure S3D.

| Unpaired t test with Welch's correction                                                 | Mean 1  | Mean 2  | SD1    | SD2    | n1 | n2 | P value | P value summary |
|-----------------------------------------------------------------------------------------|---------|---------|--------|--------|----|----|---------|-----------------|
| 2lexOpL(1,40-TATA_pCYC1min (0 nM, 1) vs. 2lexOpL(20,40-TATA_pCYC1min (0 nM, 2)          | 662.26  | 505.04  | 34.53  | 143.98 | 3  | 3  | 0.1941  | ns              |
| 2lexOpL(1,40-TATA_pCYC1min (0.98 nM, 1) vs. 2lexOpL(20,40-TATA_pCYC1min (0.98 nM, 2)    | 647.04  | 502.36  | 25.78  | 132.99 | 3  | 3  | 0.1966  | ns              |
| 2lexOpL(1,40-TATA_pCYC1min (1.95 nM, 1) vs. 2lexOpL(20,40-TATA_pCYC1min (1.95 nM, 2)    | 651.76  | 504.09  | 28.56  | 112.50 | 3  | 3  | 0.1438  | ns              |
| 2lexOpL(1,40-TATA_pCYC1min (3.91 nM, 1) vs. 2lexOpL(20,40-TATA_pCYC1min (3.91 nM, 2)    | 634.92  | 523.26  | 22.03  | 131.10 | 3  | 3  | 0.2766  | ns              |
| 2lexOpL(1,40-TATA_pCYC1min (7.81 nM, 1) vs. 2lexOpL(20,40-TATA_pCYC1min (7.81 nM, 2)    | 649.97  | 530.02  | 17.52  | 147.18 | 3  | 3  | 0.2929  | ns              |
| 2lexOpL(1,40-TATA_pCYC1min (15.63 nM, 1) vs. 2lexOpL(20,40-TATA_pCYC1min (15.63 nM, 2)  | 684.53  | 572.46  | 32.49  | 120.64 | 3  | 3  | 0.2450  | ns              |
| 2lexOpL(1,40-TATA_pCYC1min (31.25 nM, 1) vs. 2lexOpL(20,40-TATA_pCYC1min (31.25 nM, 2)  | 789.55  | 717.78  | 11.48  | 122.12 | 3  | 3  | 0.4159  | ns              |
| 2lexOpL(1,40-TATA_pCYC1min (62.5 nM, 1) vs. 2lexOpL(20,40-TATA_pCYC1min (62.5 nM, 2)    | 1051.29 | 977.96  | 93.26  | 138.35 | 3  | 3  | 0.4945  | ns              |
| 2lexOpL(1,40-TATA_pCYC1min (125 nM, 1) vs. 2lexOpL(20,40-TATA_pCYC1min (125 nM, 2)      | 1592.72 | 1597.03 | 179.65 | 208.12 | 3  | 3  | 0.9797  | ns              |
| 2lexOpL(1,40-TATA_pCYC1min (250 nM, 1) vs. 2lexOpL(20,40-TATA_pCYC1min (250 nM, 2)      | 2316.81 | 2304.19 | 184.58 | 221.51 | 3  | 3  | 0.9433  | ns              |
| 2lexOpL(1,40-TATA_pCYC1min (500 nM, 1) vs. 2lexOpL(20,40-TATA_pCYC1min (500 nM, 2)      | 3296.13 | 3299.94 | 191.35 | 177.83 | 3  | 3  | 0.9811  | ns              |
| 2lexOpL(1,40-TATA_pCYC1min (1000 nM, 1) vs. 2lexOpL(20,40-TATA_pCYC1min (1000 nM, 2)    | 4514.64 | 4809.83 | 617.48 | 524.00 | 3  | 3  | 0.5630  | ns              |
| 2lexOpL(1,40-TATA_pCYC1min (2000 nM, 1) vs. 2lexOpL(20,40-TATA_pCYC1min (2000 nM, 2)    | 3123.89 | 3421.48 | 673.21 | 744.52 | 3  | 3  | 0.6349  | ns              |
| 2lexOpL(20,40-TATA_pCYC1min (0 nM, 1) vs. 2lexOpL(40,40-TATA_pCYC1min (0 nM, 2)         | 505.04  | 312.91  | 143.98 | 29.68  | 3  | 3  | 0.1419  | ns              |
| 2lexOpL(20,40-TATA_pCYC1min (0.98 nM, 1) vs. 2lexOpL(40,40-TATA_pCYC1min (0.98 nM, 2)   | 502.36  | 268.10  | 132.99 | 32.37  | 3  | 3  | 0.0852  | ns              |
| 2lexOpL(20,40-TATA_pCYC1min (1.95 nM, 1) vs. 2lexOpL(40,40-TATA_pCYC1min (1.95 nM, 2)   | 504.09  | 306.97  | 112.50 | 26.08  | 3  | 3  | 0.0867  | ns              |
| 2lexOpL(20,40-TATA_pCYC1min (3.91 nM, 1) vs. 2lexOpL(40,40-TATA_pCYC1min (3.91 nM, 2)   | 523.26  | 321.56  | 131.10 | 17.09  | 3  | 3  | 0.1143  | ns              |
| 2lexOpL(20,40-TATA_pCYC1min (7.81 nM, 1) vs. 2lexOpL(40,40-TATA_pCYC1min (7.81 nM, 2)   | 530.02  | 322.85  | 147.18 | 63.12  | 3  | 3  | 0.1203  | ns              |
| 2lexOpL(20,40-TATA_pCYC1min (15.63 nM, 1) vs. 2lexOpL(40,40-TATA_pCYC1min (15.63 nM, 2) | 572.46  | 353.92  | 120.64 | 58.40  | 3  | 3  | 0.0695  | ns              |
| 2lexOpL(20,40-TATA_pCYC1min (31.25 nM, 1) vs. 2lexOpL(40,40-TATA_pCYC1min (31.25 nM, 2) | 717.78  | 371.21  | 122.12 | 73.60  | 3  | 3  | 0.0204  | *               |
| 2lexOpL(20,40-TATA_pCYC1min (62.5 nM, 1) vs. 2lexOpL(40,40-TATA_pCYC1min (62.5 nM, 2)   | 977.96  | 523.41  | 138.35 | 309.33 | 3  | 3  | 0.1100  | ns              |

|                                                                                            |         |         |        |         |   |   |        |    |
|--------------------------------------------------------------------------------------------|---------|---------|--------|---------|---|---|--------|----|
| 2lexOpL(20,40-TATA)_pCYC1min (125 nM, 1) vs.<br>2lexOpL(40,40-TATA)_pCYC1min (125 nM, 2)   | 1597.03 | 692.43  | 208.12 | 372.16  | 3 | 3 | 0.0323 | *  |
| 2lexOpL(20,40-TATA)_pCYC1min (250 nM, 1) vs.<br>2lexOpL(40,40-TATA)_pCYC1min (250 nM, 2)   | 2304.19 | 1187.04 | 221.51 | 690.26  | 3 | 3 | 0.0957 | ns |
| 2lexOpL(20,40-TATA)_pCYC1min (500 nM, 1) vs.<br>2lexOpL(40,40-TATA)_pCYC1min (500 nM, 2)   | 3299.94 | 1760.89 | 177.83 | 988.50  | 3 | 3 | 0.1101 | ns |
| 2lexOpL(20,40-TATA)_pCYC1min (1000 nM, 1) vs.<br>2lexOpL(40,40-TATA)_pCYC1min (1000 nM, 2) | 4809.83 | 2095.57 | 524.00 | 343.66  | 3 | 3 | 0.0030 | ** |
| 2lexOpL(20,40-TATA)_pCYC1min (2000 nM, 1) vs.<br>2lexOpL(40,40-TATA)_pCYC1min (2000 nM, 2) | 3421.48 | 2498.98 | 744.52 | 1017.21 | 3 | 3 | 0.2795 | ns |

**Table S13.** Statistical analysis of the results in Figure S3E.

| Unpaired t test with Welch's correction                                                    | Mean 1  | Mean 2   | SD1    | SD2     | n1 | n2 | P value | P value summary |
|--------------------------------------------------------------------------------------------|---------|----------|--------|---------|----|----|---------|-----------------|
| 4lexOpL(1,60-TATA)_pCYC1min (0 nM, 1) vs.<br>8lexOpL(1,60-TATA)_pCYC1min (0 nM, 2)         | 59.30   | 54.58    | 9.00   | 6.12    | 3  | 3  | 0.4999  | ns              |
| 4lexOpL(1,60-TATA)_pCYC1min (0.98 nM, 1) vs.<br>8lexOpL(1,60-TATA)_pCYC1min (0.98 nM, 2)   | 57.02   | 59.27    | 9.94   | 7.03    | 3  | 3  | 0.7666  | ns              |
| 4lexOpL(1,60-TATA)_pCYC1min (1.95 nM, 1) vs.<br>8lexOpL(1,60-TATA)_pCYC1min (1.95 nM, 2)   | 57.91   | 58.96    | 6.27   | 7.45    | 3  | 3  | 0.8615  | ns              |
| 4lexOpL(1,60-TATA)_pCYC1min (3.91 nM, 1) vs.<br>8lexOpL(1,60-TATA)_pCYC1min (3.91 nM, 2)   | 72.76   | 55.85    | 7.80   | 10.99   | 3  | 3  | 0.1028  | ns              |
| 4lexOpL(1,60-TATA)_pCYC1min (7.81 nM, 1) vs.<br>8lexOpL(1,60-TATA)_pCYC1min (7.81 nM, 2)   | 80.79   | 60.65    | 12.84  | 7.84    | 3  | 3  | 0.0949  | ns              |
| 4lexOpL(1,60-TATA)_pCYC1min (15.63 nM, 1) vs.<br>8lexOpL(1,60-TATA)_pCYC1min (15.63 nM, 2) | 131.53  | 95.65    | 32.00  | 20.49   | 3  | 3  | 0.1897  | ns              |
| 4lexOpL(1,60-TATA)_pCYC1min (31.25 nM, 1) vs.<br>8lexOpL(1,60-TATA)_pCYC1min (31.25 nM, 2) | 357.17  | 279.68   | 116.97 | 82.78   | 3  | 3  | 0.4074  | ns              |
| 4lexOpL(1,60-TATA)_pCYC1min (62.5 nM, 1) vs.<br>8lexOpL(1,60-TATA)_pCYC1min (62.5 nM, 2)   | 1028.22 | 2031.96  | 319.26 | 661.44  | 3  | 3  | 0.1023  | ns              |
| 4lexOpL(1,60-TATA)_pCYC1min (125 nM, 1) vs.<br>8lexOpL(1,60-TATA)_pCYC1min (125 nM, 2)     | 3116.69 | 6604.14  | 507.51 | 1489.47 | 3  | 3  | 0.0440  | *               |
| 4lexOpL(1,60-TATA)_pCYC1min (250 nM, 1) vs.<br>8lexOpL(1,60-TATA)_pCYC1min (250 nM, 2)     | 5057.47 | 11029.82 | 533.47 | 1471.19 | 3  | 3  | 0.0119  | *               |
| 4lexOpL(1,60-TATA)_pCYC1min (500 nM, 1) vs.<br>8lexOpL(1,60-TATA)_pCYC1min (500 nM, 2)     | 6610.82 | 12936.82 | 422.81 | 765.18  | 3  | 3  | 0.0009  | ***             |
| 4lexOpL(1,60-TATA)_pCYC1min (1000 nM, 1) vs.<br>8lexOpL(1,60-TATA)_pCYC1min (1000 nM, 2)   | 6002.86 | 15723.06 | 576.78 | 2643.56 | 3  | 3  | 0.0198  | *               |
| 4lexOpL(1,60-TATA)_pCYC1min (2000 nM, 1) vs.<br>8lexOpL(1,60-TATA)_pCYC1min (2000 nM, 2)   | 777.75  | 5162.28  | 47.26  | 3144.15 | 3  | 3  | 0.1370  | ns              |

**Table S14.** Statistical analysis of the results in Figure S4A.

| Unpaired t test with Welch's correction                                                                 | Mean 1  | Mean 2  | SD1    | SD2    | n1 | n2 | P value | P value summary |
|---------------------------------------------------------------------------------------------------------|---------|---------|--------|--------|----|----|---------|-----------------|
| lex2Op(40-TATA)_pCYC1min (0 nM, 1) vs.<br>lexOpR(1)lexOpL(40-TATA)_pCYC1min (0 nM, 2)                   | 1380.96 | 1162.50 | 144.43 | 96.54  | 3  | 3  | 0.1049  | ns              |
| lex2Op(40-TATA)_pCYC1min (0.98 nM, 1) vs.<br>lexOpR(1)lexOpL(40-TATA)_pCYC1min (0.98 nM, 2)             | 1805.33 | 1305.21 | 69.66  | 24.25  | 3  | 3  | 0.0031  | **              |
| lex2Op(40-TATA)_pCYC1min (1.95 nM, 1) vs.<br>lexOpR(1)lexOpL(40-TATA)_pCYC1min (1.95 nM, 2)             | 1993.94 | 1401.57 | 187.89 | 83.02  | 3  | 3  | 0.0189  | *               |
| lex2Op(40-TATA)_pCYC1min (3.91 nM, 1) vs.<br>lexOpR(1)lexOpL(40-TATA)_pCYC1min (3.91 nM, 2)             | 2317.61 | 1648.11 | 158.39 | 77.67  | 3  | 3  | 0.0079  | **              |
| lex2Op(40-TATA)_pCYC1min (7.81 nM, 1) vs.<br>lexOpR(1)lexOpL(40-TATA)_pCYC1min (7.81 nM, 2)             | 3078.09 | 2190.95 | 50.99  | 164.35 | 3  | 3  | 0.0069  | *               |
| lex2Op(40-TATA)_pCYC1min (15.63 nM, 1) vs.<br>lexOpR(1)lexOpL(40-TATA)_pCYC1min (15.63 nM, 2)           | 3551.08 | 2969.64 | 411.58 | 165.68 | 3  | 3  | 0.1203  | ns              |
| lex2Op(40-TATA)_pCYC1min (31.25 nM, 1) vs.<br>lexOpR(1)lexOpL(40-TATA)_pCYC1min (31.25 nM, 2)           | 3734.83 | 3929.85 | 432.83 | 63.04  | 3  | 3  | 0.5179  | ns              |
| lex2Op(40-TATA)_pCYC1min (62.5 nM, 1) vs.<br>lexOpR(1)lexOpL(40-TATA)_pCYC1min (62.5 nM, 2)             | 4656.14 | 4342.09 | 599.48 | 310.28 | 3  | 3  | 0.4793  | ns              |
| lex2Op(40-TATA)_pCYC1min (125 nM, 1) vs.<br>lexOpR(1)lexOpL(40-TATA)_pCYC1min (125 nM, 2)               | 4780.94 | 4776.37 | 636.08 | 59.37  | 3  | 3  | 0.9912  | ns              |
| lex2Op(40-TATA)_pCYC1min (250 nM, 1) vs.<br>lexOpR(1)lexOpL(40-TATA)_pCYC1min (250 nM, 2)               | 5040.43 | 4718.27 | 468.53 | 177.17 | 3  | 3  | 0.3588  | ns              |
| lex2Op(40-TATA)_pCYC1min (500 nM, 1) vs.<br>lexOpR(1)lexOpL(40-TATA)_pCYC1min (500 nM, 2)               | 3830.05 | 4901.38 | 321.82 | 217.35 | 3  | 3  | 0.0121  | *               |
| lex2Op(40-TATA)_pCYC1min (1000 nM, 1) vs.<br>lexOpR(1)lexOpL(40-TATA)_pCYC1min (1000 nM, 2)             | 3118.35 | 5082.48 | 132.88 | 188.30 | 3  | 3  | 0.0002  | ***             |
| lex2Op(40-TATA)_pCYC1min (2000 nM, 1) vs.<br>lexOpR(1)lexOpL(40-TATA)_pCYC1min (2000 nM, 2)             | 2695.02 | 4903.32 | 292.29 | 300.64 | 3  | 3  | 0.0008  | ***             |
| lexOpR(1)lexOpL(40-TATA)_pCYC1min (0 nM, 1) vs.<br>lexOpR(20)lexOpL(40-TATA)_pCYC1min (0 nM, 2)         | 1162.50 | 1135.17 | 96.54  | 137.92 | 3  | 3  | 0.7941  | ns              |
| lexOpR(1)lexOpL(40-TATA)_pCYC1min (0.98 nM, 1) vs.<br>lexOpR(20)lexOpL(40-TATA)_pCYC1min (0.98 nM, 2)   | 1305.21 | 1178.80 | 24.25  | 51.95  | 3  | 3  | 0.0349  | *               |
| lexOpR(1)lexOpL(40-TATA)_pCYC1min (1.95 nM, 1) vs.<br>lexOpR(20)lexOpL(40-TATA)_pCYC1min (1.95 nM, 2)   | 1401.57 | 1188.28 | 83.02  | 88.47  | 3  | 3  | 0.0384  | *               |
| lexOpR(1)lexOpL(40-TATA)_pCYC1min (3.91 nM, 1) vs.<br>lexOpR(20)lexOpL(40-TATA)_pCYC1min (3.91 nM, 2)   | 1648.11 | 1477.21 | 77.67  | 64.23  | 3  | 3  | 0.0444  | *               |
| lexOpR(1)lexOpL(40-TATA)_pCYC1min (7.81 nM, 1) vs.<br>lexOpR(20)lexOpL(40-TATA)_pCYC1min (7.81 nM, 2)   | 2190.95 | 1680.52 | 164.35 | 128.59 | 3  | 3  | 0.0150  | *               |
| lexOpR(1)lexOpL(40-TATA)_pCYC1min (15.63 nM, 1) vs.<br>lexOpR(20)lexOpL(40-TATA)_pCYC1min (15.63 nM, 2) | 2969.64 | 2113.31 | 165.68 | 222.29 | 3  | 3  | 0.0073  | **              |
| lexOpR(1)lexOpL(40-TATA)_pCYC1min (31.25 nM, 1) vs.<br>lexOpR(20)lexOpL(40-TATA)_pCYC1min (31.25 nM, 2) | 3929.85 | 2321.34 | 63.04  | 60.38  | 3  | 3  | <0.0001 | ****            |

|                                                                                                    |         |         |        |        |   |   |        |     |
|----------------------------------------------------------------------------------------------------|---------|---------|--------|--------|---|---|--------|-----|
| lexOpR(1)lexOpL(40-TATA)_pCYC1min (62.5 nM, 1) vs. lexOpR(20)lexOpL(40-TATA)_pCYC1min (62.5 nM, 2) | 4342.09 | 2587.71 | 310.28 | 331.45 | 3 | 3 | 0.0026 | **  |
| lexOpR(1)lexOpL(40-TATA)_pCYC1min (125 nM, 1) vs. lexOpR(20)lexOpL(40-TATA)_pCYC1min (125 nM, 2)   | 4776.37 | 2837.41 | 59.37  | 335.05 | 3 | 3 | 0.0082 | **  |
| lexOpR(1)lexOpL(40-TATA)_pCYC1min (250 nM, 1) vs. lexOpR(20)lexOpL(40-TATA)_pCYC1min (250 nM, 2)   | 4718.27 | 2959.05 | 177.17 | 290.76 | 3 | 3 | 0.0020 | **  |
| lexOpR(1)lexOpL(40-TATA)_pCYC1min (500 nM, 1) vs. lexOpR(20)lexOpL(40-TATA)_pCYC1min (500 nM, 2)   | 4901.38 | 3055.83 | 217.35 | 192.63 | 3 | 3 | 0.0004 | *** |
| lexOpR(1)lexOpL(40-TATA)_pCYC1min (1000 nM, 1) vs. lexOpR(20)lexOpL(40-TATA)_pCYC1min (1000 nM, 2) | 5082.48 | 2804.87 | 188.30 | 225.71 | 3 | 3 | 0.0002 | *** |
| lexOpR(1)lexOpL(40-TATA)_pCYC1min (2000 nM, 1) vs. lexOpR(20)lexOpL(40-TATA)_pCYC1min (2000 nM, 2) | 4903.32 | 2616.75 | 300.64 | 99.92  | 3 | 3 | 0.0029 | **  |

**Table S15.** Statistical analysis of the results in Figure S4B.

| Unpaired t test with Welch's correction                                                              | Mean 1  | Mean 2  | SD1    | SD2    | n1 | n2 | P value | P value summary |
|------------------------------------------------------------------------------------------------------|---------|---------|--------|--------|----|----|---------|-----------------|
| lex2Op(40-TATA)_pCYC1min (0 nM, 1) vs. lexOpR(1)lexOpL(40-TATA)_pCYC1min (0 nM, 2)                   | 506.67  | 633.41  | 52.07  | 144.71 | 3  | 3  | 0.2653  | ns              |
| lex2Op(40-TATA)_pCYC1min (0.98 nM, 1) vs. lexOpR(1)lexOpL(40-TATA)_pCYC1min (0.98 nM, 2)             | 489.88  | 732.86  | 99.88  | 43.55  | 3  | 3  | 0.0361  | *               |
| lex2Op(40-TATA)_pCYC1min (1.95 nM, 1) vs. lexOpR(1)lexOpL(40-TATA)_pCYC1min (1.95 nM, 2)             | 514.05  | 703.36  | 57.36  | 33.80  | 3  | 3  | 0.0134  | *               |
| lex2Op(40-TATA)_pCYC1min (3.91 nM, 1) vs. lexOpR(1)lexOpL(40-TATA)_pCYC1min (3.91 nM, 2)             | 560.30  | 750.94  | 66.83  | 34.91  | 3  | 3  | 0.0218  | *               |
| lex2Op(40-TATA)_pCYC1min (7.81 nM, 1) vs. lexOpR(1)lexOpL(40-TATA)_pCYC1min (7.81 nM, 2)             | 580.16  | 747.72  | 43.20  | 43.46  | 3  | 3  | 0.0091  | **              |
| lex2Op(40-TATA)_pCYC1min (15.63 nM, 1) vs. lexOpR(1)lexOpL(40-TATA)_pCYC1min (15.63 nM, 2)           | 638.61  | 743.01  | 57.63  | 22.30  | 3  | 3  | 0.0733  | ns              |
| lex2Op(40-TATA)_pCYC1min (31.25 nM, 1) vs. lexOpR(1)lexOpL(40-TATA)_pCYC1min (31.25 nM, 2)           | 817.10  | 879.13  | 94.21  | 23.32  | 3  | 3  | 0.3727  | ns              |
| lex2Op(40-TATA)_pCYC1min (62.5 nM, 1) vs. lexOpR(1)lexOpL(40-TATA)_pCYC1min (62.5 nM, 2)             | 1253.75 | 1038.34 | 148.26 | 25.64  | 3  | 3  | 0.1243  | ns              |
| lex2Op(40-TATA)_pCYC1min (125 nM, 1) vs. lexOpR(1)lexOpL(40-TATA)_pCYC1min (125 nM, 2)               | 2019.70 | 1752.09 | 156.78 | 255.49 | 3  | 3  | 0.2111  | ns              |
| lex2Op(40-TATA)_pCYC1min (250 nM, 1) vs. lexOpR(1)lexOpL(40-TATA)_pCYC1min (250 nM, 2)               | 2816.94 | 2360.55 | 203.63 | 180.63 | 3  | 3  | 0.0447  | *               |
| lex2Op(40-TATA)_pCYC1min (500 nM, 1) vs. lexOpR(1)lexOpL(40-TATA)_pCYC1min (500 nM, 2)               | 3910.82 | 3412.51 | 364.54 | 470.10 | 3  | 3  | 0.2247  | ns              |
| lex2Op(40-TATA)_pCYC1min (1000 nM, 1) vs. lexOpR(1)lexOpL(40-TATA)_pCYC1min (1000 nM, 2)             | 4479.33 | 4215.73 | 135.08 | 391.76 | 3  | 3  | 0.3663  | ns              |
| lex2Op(40-TATA)_pCYC1min (2000 nM, 1) vs. lexOpR(1)lexOpL(40-TATA)_pCYC1min (2000 nM, 2)             | 3012.43 | 2228.86 | 268.00 | 91.85  | 3  | 3  | 0.0267  | *               |
| lexOpR(20)lexOpL(40-TATA)_pCYC1min (0 nM, 2) vs. lexOpR(1)lexOpL(40-TATA)_pCYC1min (0 nM, 2)         | 633.41  | 457.75  | 144.71 | 37.88  | 3  | 3  | 0.1634  | ns              |
| lexOpR(20)lexOpL(40-TATA)_pCYC1min (0.98 nM, 2) vs. lexOpR(1)lexOpL(40-TATA)_pCYC1min (0.98 nM, 2)   | 732.86  | 435.43  | 43.55  | 18.38  | 3  | 3  | 0.0027  | **              |
| lexOpR(20)lexOpL(40-TATA)_pCYC1min (1.95 nM, 2) vs. lexOpR(1)lexOpL(40-TATA)_pCYC1min (1.95 nM, 2)   | 703.36  | 455.94  | 33.80  | 33.84  | 3  | 3  | 0.0009  | ***             |
| lexOpR(20)lexOpL(40-TATA)_pCYC1min (3.91 nM, 2) vs. lexOpR(1)lexOpL(40-TATA)_pCYC1min (3.91 nM, 2)   | 750.94  | 469.31  | 34.91  | 43.93  | 3  | 3  | 0.0012  | **              |
| lexOpR(20)lexOpL(40-TATA)_pCYC1min (7.81 nM, 2) vs. lexOpR(1)lexOpL(40-TATA)_pCYC1min (7.81 nM, 2)   | 747.72  | 486.38  | 43.46  | 46.33  | 3  | 3  | 0.0021  | **              |
| lexOpR(20)lexOpL(40-TATA)_pCYC1min (15.63 nM, 2) vs. lexOpR(1)lexOpL(40-TATA)_pCYC1min (15.63 nM, 2) | 743.01  | 498.20  | 22.30  | 52.65  | 3  | 3  | 0.0072  | **              |
| lexOpR(20)lexOpL(40-TATA)_pCYC1min (31.25 nM, 2) vs. lexOpR(1)lexOpL(40-TATA)_pCYC1min (31.25 nM, 2) | 879.13  | 627.86  | 23.32  | 64.92  | 3  | 3  | 0.0134  | *               |
| lexOpR(20)lexOpL(40-TATA)_pCYC1min (62.5 nM, 2) vs. lexOpR(1)lexOpL(40-TATA)_pCYC1min (62.5 nM, 2)   | 1038.34 | 874.21  | 25.64  | 96.43  | 3  | 3  | 0.0897  | ns              |
| lexOpR(20)lexOpL(40-TATA)_pCYC1min (125 nM, 2) vs. lexOpR(1)lexOpL(40-TATA)_pCYC1min (125 nM, 2)     | 1752.09 | 1471.87 | 255.49 | 216.53 | 3  | 3  | 0.2227  | ns              |
| lexOpR(20)lexOpL(40-TATA)_pCYC1min (250 nM, 2) vs. lexOpR(1)lexOpL(40-TATA)_pCYC1min (250 nM, 2)     | 2360.55 | 2180.92 | 180.63 | 196.07 | 3  | 3  | 0.3084  | ns              |
| lexOpR(20)lexOpL(40-TATA)_pCYC1min (500 nM, 2) vs. lexOpR(1)lexOpL(40-TATA)_pCYC1min (500 nM, 2)     | 3412.51 | 3471.51 | 470.10 | 201.55 | 3  | 3  | 0.8557  | ns              |
| lexOpR(20)lexOpL(40-TATA)_pCYC1min (1000 nM, 2) vs. lexOpR(1)lexOpL(40-TATA)_pCYC1min (1000 nM, 2)   | 4215.73 | 4364.54 | 391.76 | 505.83 | 3  | 3  | 0.7089  | ns              |
| lexOpR(20)lexOpL(40-TATA)_pCYC1min (2000 nM, 2) vs. lexOpR(1)lexOpL(40-TATA)_pCYC1min (2000 nM, 2)   | 2228.86 | 2672.85 | 91.85  | 163.28 | 3  | 3  | 0.0238  | *               |

**Table S16.** Statistical analysis of the results in Figure 1A.

| Unpaired t test with Welch's correction             | Mean 1 | Mean 2 | SD1    | SD2    | n1 | n2 | P value | P value summary |
|-----------------------------------------------------|--------|--------|--------|--------|----|----|---------|-----------------|
| pGPD-VP64 (15.63 nM, 1) vs. pGPD-VP64 (31.25 nM, 2) | 5526   | 5123   | 321.40 | 518.49 | 3  | 3  | 0.3276  | ns              |
| pGPD-VP64 (31.25 nM, 1) vs. pGPD-VP64 (62.5 nM, 2)  | 5123   | 3575   | 518.49 | 121.57 | 3  | 3  | 0.03    | *               |

**Table S17.** Statistical analysis of the results in Figure 1B.

| Unpaired t test with Welch's correction                                   | Mean 1  | Mean 2  | SD1   | SD2   | n1 | n2 | P value | P value summary |
|---------------------------------------------------------------------------|---------|---------|-------|-------|----|----|---------|-----------------|
| lexOpL(40-TATA)_pCYC1min (0 nM, 1) vs. lexOpR(40-TATA)_pCYC1min (0 nM, 2) | 1195.68 | 1151.80 | 60.26 | 54.28 | 3  | 3  | 0.4090  | ns              |

|                                                                                   |         |         |        |        |   |   |        |    |
|-----------------------------------------------------------------------------------|---------|---------|--------|--------|---|---|--------|----|
| lexOpL(40-TATA)_pCYC1min (0.98 nM, 1) vs. lexOpR(40-TATA)_pCYC1min (0.98 nM, 2)   | 1328.44 | 1153.16 | 32.64  | 36.54  | 3 | 3 | 0.0036 | ** |
| lexOpL(40-TATA)_pCYC1min (1.95 nM, 1) vs. lexOpR(40-TATA)_pCYC1min (1.95 nM, 2)   | 1246.74 | 1239.77 | 72.19  | 56.12  | 3 | 3 | 0.9121 | ns |
| lexOpL(40-TATA)_pCYC1min (3.91 nM, 1) vs. lexOpR(40-TATA)_pCYC1min (3.91 nM, 2)   | 1300.84 | 1282.50 | 50.06  | 47.40  | 3 | 3 | 0.6830 | ns |
| lexOpL(40-TATA)_pCYC1min (7.81 nM, 1) vs. lexOpR(40-TATA)_pCYC1min (7.81 nM, 2)   | 1523.74 | 1345.78 | 122.55 | 52.22  | 3 | 3 | 0.1142 | ns |
| lexOpL(40-TATA)_pCYC1min (15.63 nM, 1) vs. lexOpR(40-TATA)_pCYC1min (15.63 nM, 2) | 1825.41 | 1659.50 | 142.09 | 25.34  | 3 | 3 | 0.1777 | ns |
| lexOpL(40-TATA)_pCYC1min (31.25 nM, 1) vs. lexOpR(40-TATA)_pCYC1min (31.25 nM, 2) | 2134.61 | 1995.42 | 155.99 | 29.56  | 3 | 3 | 0.2616 | ns |
| lexOpL(40-TATA)_pCYC1min (62.5 nM, 1) vs. lexOpR(40-TATA)_pCYC1min (62.5 nM, 2)   | 2418.89 | 2285.21 | 128.51 | 12.03  | 3 | 3 | 0.2145 | ns |
| lexOpL(40-TATA)_pCYC1min (125 nM, 1) vs. lexOpR(40-TATA)_pCYC1min (125 nM, 2)     | 2584.39 | 2607.81 | 132.72 | 147.92 | 3 | 3 | 0.8459 | ns |
| lexOpL(40-TATA)_pCYC1min (250 nM, 1) vs. lexOpR(40-TATA)_pCYC1min (250 nM, 2)     | 2681.84 | 2686.88 | 196.22 | 43.75  | 3 | 3 | 0.9638 | ns |
| lexOpL(40-TATA)_pCYC1min (500 nM, 1) vs. lexOpR(40-TATA)_pCYC1min (500 nM, 2)     | 2828.21 | 2656.86 | 273.33 | 105.34 | 3 | 3 | 0.3968 | ns |
| lexOpL(40-TATA)_pCYC1min (1000 nM, 1) vs. lexOpR(40-TATA)_pCYC1min (1000 nM, 2)   | 2693.62 | 2549.73 | 106.07 | 104.43 | 3 | 3 | 0.1708 | ns |
| lexOpL(40-TATA)_pCYC1min (2000 nM, 1) vs. lexOpR(40-TATA)_pCYC1min (2000 nM, 2)   | 2685.73 | 2394.92 | 159.22 | 64.72  | 3 | 3 | 0.0716 | ns |

**Table S18.** Statistical analysis of the results in Figure 1C—ANOVA. 1 corresponds to 2lexOpL(1, 40-TATA) pCYC1min, 2 to 2lexOpR(20, 40-TATA) pCYC1min, and 3 to 2lexOpL(20, 40-TATA) pCYC1min.

| Ordinary one-way ANOVA | Mean 1  | Mean 2  | Mean 3  | SD1    | SD2    | SD3    | n1 | n2 | n3 | P value | P value summary |
|------------------------|---------|---------|---------|--------|--------|--------|----|----|----|---------|-----------------|
| 0 nM group             | 1169.79 | 1286.57 | 1044.01 | 82.22  | 112.92 | 211.16 | 3  | 3  | 3  | 0.2076  | ns              |
| 0.98 nM group          | 1301.89 | 1358.01 | 1087.50 | 71.07  | 63.04  | 169.80 | 3  | 3  | 3  | 0.0559  | ns              |
| 1.95 nM group          | 1383.30 | 1536.94 | 1232.29 | 72.74  | 139.64 | 239.89 | 3  | 3  | 3  | 0.1591  | ns              |
| 3.91 nM group          | 1641.33 | 1787.68 | 1649.41 | 49.21  | 347.01 | 166.40 | 3  | 3  | 3  | 0.6841  | ns              |
| 7.81 nM group          | 2033.93 | 2357.79 | 2076.62 | 207.42 | 419.51 | 163.68 | 3  | 3  | 3  | 0.3823  | ns              |
| 15.63 nM group         | 2489.27 | 3060.85 | 3171.12 | 303.70 | 494.94 | 258.63 | 3  | 3  | 3  | 0.126   | ns              |
| 31.25 nM group         | 3342.98 | 3791.28 | 3961.30 | 359.35 | 436.48 | 113.00 | 3  | 3  | 3  | 0.1411  | ns              |
| 62.5 nM group          | 4699.90 | 4302.14 | 4290.64 | 221.08 | 437.34 | 219.59 | 3  | 3  | 3  | 0.2609  | ns              |
| 125 nM group           | 4753.96 | 4691.35 | 4855.24 | 369.00 | 373.73 | 482.11 | 3  | 3  | 3  | 0.888   | ns              |
| 250 nM group           | 5031.74 | 4644.15 | 5088.86 | 261.15 | 175.45 | 441.84 | 3  | 3  | 3  | 0.2455  | ns              |
| 500 nM group           | 4927.32 | 4161.00 | 4770.68 | 289.76 | 76.45  | 132.02 | 3  | 3  | 3  | 0.0057  | **              |
| 1000 nM group          | 4873.29 | 3814.81 | 4542.48 | 344.84 | 160.51 | 99.64  | 3  | 3  | 3  | 0.0033  | **              |
| 2000 nM group          | 5078.57 | 3621.49 | 4601.9  | 277.70 | 130.57 | 419.41 | 3  | 3  | 3  | 0.0028  | **              |

**Table S19.** Statistical analysis of the results in Figure 1C—Welch's t test.

| Unpaired t test with Welch's correction                                                   | Mean 1  | Mean 2  | SD1    | SD2    | n1 | n2 | P value | P value summary |
|-------------------------------------------------------------------------------------------|---------|---------|--------|--------|----|----|---------|-----------------|
| 2lexOpR(1, 40-TATA)_pCYC1min (0 nM, 1) vs. 2lexOpL(1, 40-TATA)_pCYC1min (0 nM, 2)         | 786.69  | 1169.79 | 12.35  | 82.22  | 3  | 3  | 0.0135  | *               |
| 2lexOpR(1, 40-TATA)_pCYC1min (0.98 nM, 1) vs. 2lexOpL(1, 40-TATA)_pCYC1min (0.98 nM, 2)   | 819.36  | 1301.89 | 27.82  | 71.07  | 3  | 3  | 0.0030  | **              |
| 2lexOpR(1, 40-TATA)_pCYC1min (1.95 nM, 1) vs. 2lexOpL(1, 40-TATA)_pCYC1min (1.95 nM, 2)   | 800.09  | 1383.30 | 20.35  | 72.74  | 3  | 3  | 0.0031  | **              |
| 2lexOpR(1, 40-TATA)_pCYC1min (3.91 nM, 1) vs. 2lexOpL(1, 40-TATA)_pCYC1min (3.91 nM, 2)   | 830.99  | 1641.33 | 33.67  | 49.21  | 3  | 3  | <0.0001 | ****            |
| 2lexOpR(1, 40-TATA)_pCYC1min (7.81 nM, 1) vs. 2lexOpL(1, 40-TATA)_pCYC1min (7.81 nM, 2)   | 966.60  | 2033.93 | 66.84  | 207.42 | 3  | 3  | 0.0075  | **              |
| 2lexOpR(1, 40-TATA)_pCYC1min (15.63 nM, 1) vs. 2lexOpL(1, 40-TATA)_pCYC1min (15.63 nM, 2) | 1210.39 | 2489.27 | 143.18 | 303.70 | 3  | 3  | 0.0083  | **              |
| 2lexOpR(1, 40-TATA)_pCYC1min (31.25 nM, 1) vs. 2lexOpL(1, 40-TATA)_pCYC1min (31.25 nM, 2) | 1555.58 | 3342.98 | 148.62 | 359.35 | 3  | 3  | 0.0063  | **              |
| 2lexOpR(1, 40-TATA)_pCYC1min (62.5 nM, 1) vs. 2lexOpL(1, 40-TATA)_pCYC1min (62.5 nM, 2)   | 1960.84 | 4699.90 | 171.59 | 221.08 | 3  | 3  | 0.0001  | ***             |
| 2lexOpR(1, 40-TATA)_pCYC1min (125 nM, 1) vs. 2lexOpL(1, 40-TATA)_pCYC1min (125 nM, 2)     | 2103.12 | 4753.96 | 95.96  | 369.00 | 3  | 3  | 0.0042  | **              |
| 2lexOpR(1, 40-TATA)_pCYC1min (250 nM, 1) vs. 2lexOpL(1, 40-TATA)_pCYC1min (250 nM, 2)     | 2315.31 | 5031.74 | 39.98  | 261.15 | 3  | 3  | 0.0025  | **              |
| 2lexOpR(1, 40-TATA)_pCYC1min (500 nM, 1) vs. 2lexOpL(1, 40-TATA)_pCYC1min (500 nM, 2)     | 2352.42 | 4927.32 | 141.50 | 289.76 | 3  | 3  | 0.0010  | ***             |
| 2lexOpR(1, 40-TATA)_pCYC1min (1000 nM, 1) vs. 2lexOpL(1, 40-TATA)_pCYC1min (1000 nM, 2)   | 2277.97 | 4873.29 | 192.58 | 344.84 | 3  | 3  | 0.0012  | **              |
| 2lexOpR(1, 40-TATA)_pCYC1min (2000 nM, 1) vs. 2lexOpL(1, 40-TATA)_pCYC1min (2000 nM, 2)   | 2284.02 | 5078.57 | 272.49 | 277.70 | 3  | 3  | 0.0002  | ***             |
| 2lexOpR(20, 40-TATA)_pCYC1min (500 nM, 1) vs. 2lexOpL(1, 40-TATA)_pCYC1min (500 nM, 2)    | 4161.00 | 4927.32 | 76.45  | 289.76 | 3  | 3  | 0.0372  | *               |
| 2lexOpR(20, 40-TATA)_pCYC1min (1000 nM, 1) vs. 2lexOpL(1, 40-TATA)_pCYC1min (1000 nM, 2)  | 3814.81 | 4873.29 | 160.51 | 344.84 | 3  | 3  | 0.0195  | *               |

|                                                                                              |         |         |        |        |   |   |        |    |
|----------------------------------------------------------------------------------------------|---------|---------|--------|--------|---|---|--------|----|
| 2lexOpR(20, 40-TATA)_pCYC1min (2000 nM, 1) vs.<br>2lexOpL(1, 40-TATA)_pCYC1min (2000 nM, 2)  | 3621.49 | 5078.57 | 130.57 | 277.70 | 3 | 3 | 0.0046 | ** |
| 2lexOpR(20, 40-TATA)_pCYC1min (500 nM, 1) vs.<br>2lexOpL(20, 40-TATA)_pCYC1min (500 nM, 2)   | 4161.00 | 4770.68 | 76.45  | 132.02 | 3 | 3 | 0.0050 | ** |
| 2lexOpR(20, 40-TATA)_pCYC1min (1000 nM, 1) vs.<br>2lexOpL(20, 40-TATA)_pCYC1min (1000 nM, 2) | 3814.81 | 4542.48 | 160.51 | 99.64  | 3 | 3 | 0.0049 | ** |
| 2lexOpR(20, 40-TATA)_pCYC1min (2000 nM, 1) vs.<br>2lexOpL(20, 40-TATA)_pCYC1min (2000 nM, 2) | 3621.49 | 4601.90 | 130.57 | 419.41 | 3 | 3 | 0.0456 | *  |

**Table S20.** Statistical analysis of the results in Figure 1D.

| Unpaired t test with Welch's correction                                              | Mean 1  | Mean 2  | SD1    | SD2    | n1 | n2 | P value | P value summary |
|--------------------------------------------------------------------------------------|---------|---------|--------|--------|----|----|---------|-----------------|
| lexOpL(20-TATA)_pCYC1min (0 nM, 1) vs.<br>lexOpL(40-TATA)_pCYC1min (0 nM, 2)         | 503.46  | 1195.68 | 20.68  | 60.26  | 3  | 3  | 0.0010  | **              |
| lexOpL(20-TATA)_pCYC1min (0.98 nM, 1) vs.<br>lexOpL(40-TATA)_pCYC1min (0.98 nM, 2)   | 513.64  | 1328.44 | 25.81  | 32.64  | 3  | 3  | <0.0001 | ****            |
| lexOpL(20-TATA)_pCYC1min (1.95 nM, 1) vs.<br>lexOpL(40-TATA)_pCYC1min (1.95 nM, 2)   | 542.20  | 1246.74 | 35.05  | 72.19  | 3  | 3  | 0.0008  | ***             |
| lexOpL(20-TATA)_pCYC1min (3.91 nM, 1) vs.<br>lexOpL(40-TATA)_pCYC1min (3.91 nM, 2)   | 643.73  | 1300.84 | 175.29 | 50.06  | 3  | 3  | 0.0169  | *               |
| lexOpL(20-TATA)_pCYC1min (7.81 nM, 1) vs.<br>lexOpL(40-TATA)_pCYC1min (7.81 nM, 2)   | 691.28  | 1523.74 | 194.76 | 122.55 | 3  | 3  | 0.0058  | **              |
| lexOpL(20-TATA)_pCYC1min (15.63 nM, 1) vs.<br>lexOpL(40-TATA)_pCYC1min (15.63 nM, 2) | 794.03  | 1825.41 | 191.17 | 142.09 | 3  | 3  | 0.0023  | **              |
| lexOpL(20-TATA)_pCYC1min (31.25 nM, 1) vs.<br>lexOpL(40-TATA)_pCYC1min (31.25 nM, 2) | 843.45  | 2134.61 | 173.82 | 155.99 | 3  | 3  | 0.0007  | ***             |
| lexOpL(20-TATA)_pCYC1min (62.5 nM, 1) vs.<br>lexOpL(40-TATA)_pCYC1min (62.5 nM, 2)   | 1078.73 | 2418.89 | 119.58 | 128.51 | 3  | 3  | 0.0002  | ***             |
| lexOpL(20-TATA)_pCYC1min (125 nM, 1) vs.<br>lexOpL(40-TATA)_pCYC1min (125 nM, 2)     | 1190.67 | 2584.39 | 42.61  | 132.72 | 3  | 3  | 0.0014  | **              |
| lexOpL(20-TATA)_pCYC1min (250 nM, 1) vs.<br>lexOpL(40-TATA)_pCYC1min (250 nM, 2)     | 1256.70 | 2681.84 | 129.06 | 196.22 | 3  | 3  | 0.0010  | ***             |
| lexOpL(20-TATA)_pCYC1min (500 nM, 1) vs.<br>lexOpL(40-TATA)_pCYC1min (500 nM, 2)     | 1231.34 | 2828.21 | 49.75  | 273.33 | 3  | 3  | 0.0080  | **              |
| lexOpL(20-TATA)_pCYC1min (1000 nM, 1) vs.<br>lexOpL(40-TATA)_pCYC1min (1000 nM, 2)   | 1262.79 | 2693.62 | 206.27 | 106.07 | 3  | 3  | 0.0018  | **              |
| lexOpL(20-TATA)_pCYC1min (2000 nM, 1) vs.<br>lexOpL(40-TATA)_pCYC1min (2000 nM, 2)   | 1174.57 | 2685.73 | 339.47 | 159.22 | 3  | 3  | 0.0072  | **              |
| lexOpL(40-TATA)_pCYC1min (0 nM, 1) vs.<br>lexOpL(60-TATA)_pCYC1min (0 nM, 2)         | 1195.68 | 1447.73 | 60.26  | 72.45  | 3  | 3  | 0.0106  | *               |
| lexOpL(40-TATA)_pCYC1min (0.98 nM, 1) vs.<br>lexOpL(60-TATA)_pCYC1min (0.98 nM, 2)   | 1328.44 | 1432.79 | 32.64  | 57.46  | 3  | 3  | 0.0674  | ns              |
| lexOpL(40-TATA)_pCYC1min (1.95 nM, 1) vs.<br>lexOpL(60-TATA)_pCYC1min (1.95 nM, 2)   | 1246.74 | 1724.91 | 72.19  | 129.43 | 3  | 3  | 0.0101  | *               |
| lexOpL(40-TATA)_pCYC1min (3.91 nM, 1) vs.<br>lexOpL(60-TATA)_pCYC1min (3.91 nM, 2)   | 1300.84 | 1966.89 | 50.06  | 158.95 | 3  | 3  | 0.0123  | *               |
| lexOpL(40-TATA)_pCYC1min (7.81 nM, 1) vs.<br>lexOpL(60-TATA)_pCYC1min (7.81 nM, 2)   | 1523.74 | 2568.23 | 122.55 | 462.37 | 3  | 3  | 0.0514  | ns              |
| lexOpL(40-TATA)_pCYC1min (15.63 nM, 1) vs.<br>lexOpL(60-TATA)_pCYC1min (15.63 nM, 2) | 1825.41 | 3278.03 | 142.09 | 308.03 | 3  | 3  | 0.0063  | **              |
| lexOpL(40-TATA)_pCYC1min (31.25 nM, 1) vs.<br>lexOpL(60-TATA)_pCYC1min (31.25 nM, 2) | 2134.61 | 3997.80 | 155.99 | 479.30 | 3  | 3  | 0.0143  | *               |
| lexOpL(40-TATA)_pCYC1min (62.5 nM, 1) vs.<br>lexOpL(60-TATA)_pCYC1min (62.5 nM, 2)   | 2418.89 | 3956.27 | 128.51 | 218.68 | 3  | 3  | 0.0013  | **              |
| lexOpL(40-TATA)_pCYC1min (125 nM, 1) vs.<br>lexOpL(60-TATA)_pCYC1min (125 nM, 2)     | 2584.39 | 4112.55 | 132.72 | 330.29 | 3  | 3  | 0.0078  | **              |
| lexOpL(40-TATA)_pCYC1min (250 nM, 1) vs.<br>lexOpL(60-TATA)_pCYC1min (250 nM, 2)     | 2681.84 | 4607.45 | 196.22 | 111.28 | 3  | 3  | 0.0005  | ***             |
| lexOpL(40-TATA)_pCYC1min (500 nM, 1) vs.<br>lexOpL(60-TATA)_pCYC1min (500 nM, 2)     | 2828.21 | 4320.88 | 273.33 | 217.66 | 3  | 3  | 0.0022  | **              |
| lexOpL(40-TATA)_pCYC1min (1000 nM, 1) vs.<br>lexOpL(60-TATA)_pCYC1min (1000 nM, 2)   | 2693.62 | 4107.81 | 106.07 | 117.86 | 3  | 3  | 0.0001  | ***             |
| lexOpL(40-TATA)_pCYC1min (2000 nM, 1) vs.<br>lexOpL(60-TATA)_pCYC1min (2000 nM, 2)   | 2685.73 | 3853.35 | 159.22 | 431.26 | 3  | 3  | 0.0306  | *               |

**Table S21.** Statistical analysis of the results in Figure 1E.

| Unpaired t test with Welch's correction                                                     | Mean 1  | Mean 2  | SD1    | SD2    | n1 | n2 | P value | P value summary |
|---------------------------------------------------------------------------------------------|---------|---------|--------|--------|----|----|---------|-----------------|
| 2lexOpL(1,40-TATA)_pCYC1min (0 nM, 1) vs.<br>2lexOpL(20,40-TATA)_pCYC1min (0 nM, 2)         | 1169.79 | 1044.01 | 82.22  | 211.16 | 3  | 3  | 0.4172  | ns              |
| 2lexOpL(1,40-TATA)_pCYC1min (0.98 nM, 1) vs.<br>2lexOpL(20,40-TATA)_pCYC1min (0.98 nM, 2)   | 1301.89 | 1087.50 | 71.07  | 169.80 | 3  | 3  | 0.1478  | ns              |
| 2lexOpL(1,40-TATA)_pCYC1min (1.95 nM, 1) vs.<br>2lexOpL(20,40-TATA)_pCYC1min (1.95 nM, 2)   | 1383.30 | 1232.29 | 72.74  | 239.89 | 3  | 3  | 0.3915  | ns              |
| 2lexOpL(1,40-TATA)_pCYC1min (3.91 nM, 1) vs.<br>2lexOpL(20,40-TATA)_pCYC1min (3.91 nM, 2)   | 1641.33 | 1649.41 | 49.21  | 166.40 | 3  | 3  | 0.9421  | ns              |
| 2lexOpL(1,40-TATA)_pCYC1min (7.81 nM, 1) vs.<br>2lexOpL(20,40-TATA)_pCYC1min (7.81 nM, 2)   | 2033.93 | 2076.62 | 207.42 | 163.68 | 3  | 3  | 0.7942  | ns              |
| 2lexOpL(1,40-TATA)_pCYC1min (15.63 nM, 1) vs.<br>2lexOpL(20,40-TATA)_pCYC1min (15.63 nM, 2) | 2489.27 | 3171.12 | 303.70 | 258.63 | 3  | 3  | 0.0428  | *               |
| 2lexOpL(1,40-TATA)_pCYC1min (31.25 nM, 1) vs.<br>2lexOpL(20,40-TATA)_pCYC1min (31.25 nM, 2) | 3342.98 | 3961.30 | 359.35 | 113.00 | 3  | 3  | 0.0853  | ns              |
| 2lexOpL(1,40-TATA)_pCYC1min (62.5 nM, 1) vs.<br>2lexOpL(20,40-TATA)_pCYC1min (62.5 nM, 2)   | 4699.90 | 4290.64 | 221.08 | 219.59 | 3  | 3  | 0.0853  | ns              |



|                                                                                           |         |         |        |        |   |   |        |    |
|-------------------------------------------------------------------------------------------|---------|---------|--------|--------|---|---|--------|----|
| 2lexOpL(1,40-TATA)_pCYC1min (125 nM, 1) vs. 2lexOpL(20,40-TATA)_pCYC1min (125 nM, 2)      | 4753.96 | 4855.24 | 369.00 | 482.11 | 3 | 3 | 0.7879 | ns |
| 2lexOpL(1,40-TATA)_pCYC1min (250 nM, 1) vs. 2lexOpL(20,40-TATA)_pCYC1min (250 nM, 2)      | 5031.74 | 5088.86 | 261.15 | 441.84 | 3 | 3 | 0.8596 | ns |
| 2lexOpL(1,40-TATA)_pCYC1min (500 nM, 1) vs. 2lexOpL(20,40-TATA)_pCYC1min (500 nM, 2)      | 4927.32 | 4770.68 | 289.76 | 132.02 | 3 | 3 | 0.4609 | ns |
| 2lexOpL(1,40-TATA)_pCYC1min (1000 nM, 1) vs. 2lexOpL(20,40-TATA)_pCYC1min (1000 nM, 2)    | 4873.29 | 4542.48 | 344.84 | 99.64  | 3 | 3 | 0.2338 | ns |
| 2lexOpL(1,40-TATA)_pCYC1min (2000 nM, 1) vs. 2lexOpL(20,40-TATA)_pCYC1min (2000 nM, 2)    | 5078.57 | 4601.90 | 277.70 | 419.41 | 3 | 3 | 0.1868 | ns |
| 2lexOpL(1,40-TATA)_pCYC1min (0 nM, 1) vs. 2lexOpL(40,40-TATA)_pCYC1min (0 nM, 2)          | 1044.01 | 917.75  | 211.16 | 84.45  | 3 | 3 | 0.4163 | ns |
| 2lexOpL(20,40-TATA)_pCYC1min (0.98 nM, 1) vs. 2lexOpL(40,40-TATA)_pCYC1min (0.98 nM, 2)   | 1087.50 | 733.96  | 169.80 | 52.05  | 3 | 3 | 0.0584 | ns |
| 2lexOpL(20,40-TATA)_pCYC1min (1.95 nM, 1) vs. 2lexOpL(40,40-TATA)_pCYC1min (1.95 nM, 2)   | 1232.29 | 895.98  | 239.89 | 142.24 | 3 | 3 | 0.1209 | ns |
| 2lexOpL(20,40-TATA)_pCYC1min (3.91 nM, 1) vs. 2lexOpL(40,40-TATA)_pCYC1min (3.91 nM, 2)   | 1649.41 | 944.82  | 166.40 | 221.48 | 3 | 3 | 0.0137 | *  |
| 2lexOpL(20,40-TATA)_pCYC1min (7.81 nM, 1) vs. 2lexOpL(40,40-TATA)_pCYC1min (7.81 nM, 2)   | 2076.62 | 1131.98 | 163.68 | 354.56 | 3 | 3 | 0.0281 | *  |
| 2lexOpL(20,40-TATA)_pCYC1min (15.63 nM, 1) vs. 2lexOpL(40,40-TATA)_pCYC1min (15.63 nM, 2) | 3171.12 | 1290.01 | 258.63 | 366.22 | 3 | 3 | 0.0028 | ** |
| 2lexOpL(20,40-TATA)_pCYC1min (31.25 nM, 1) vs. 2lexOpL(40,40-TATA)_pCYC1min (31.25 nM, 2) | 3961.30 | 1663.23 | 113.00 | 741.61 | 3 | 3 | 0.0306 | *  |
| 2lexOpL(20,40-TATA)_pCYC1min (62.5 nM, 1) vs. 2lexOpL(40,40-TATA)_pCYC1min (62.5 nM, 2)   | 4290.64 | 2080.26 | 219.59 | 867.34 | 3 | 3 | 0.0407 | *  |
| 2lexOpL(20,40-TATA)_pCYC1min (125 nM, 1) vs. 2lexOpL(40,40-TATA)_pCYC1min (125 nM, 2)     | 4855.24 | 2726.42 | 482.11 | 995.51 | 3 | 3 | 0.0471 | *  |
| 2lexOpL(20,40-TATA)_pCYC1min (250 nM, 1) vs. 2lexOpL(40,40-TATA)_pCYC1min (250 nM, 2)     | 5088.86 | 3272.24 | 441.84 | 555.23 | 3 | 3 | 0.0127 | *  |
| 2lexOpL(20,40-TATA)_pCYC1min (500 nM, 1) vs. 2lexOpL(40,40-TATA)_pCYC1min (500 nM, 2)     | 4770.68 | 3591.87 | 132.02 | 290.83 | 3 | 3 | 0.0096 | ** |
| 2lexOpL(20,40-TATA)_pCYC1min (1000 nM, 1) vs. 2lexOpL(40,40-TATA)_pCYC1min (1000 nM, 2)   | 4542.48 | 3760.77 | 99.64  | 317.59 | 3 | 3 | 0.0407 | *  |
| 2lexOpL(20,40-TATA)_pCYC1min (2000 nM, 1) vs. 2lexOpL(40,40-TATA)_pCYC1min (2000 nM, 2)   | 4601.90 | 4042.06 | 419.41 | 292.75 | 3 | 3 | 0.1393 | ns |

**Table S22.** Statistical analysis of the results in Figure 1F.

| Unpaired t test with Welch's correction                                                 | Mean 1  | Mean 2   | SD1     | SD2     | n1 | n2 | P value | P value summary |
|-----------------------------------------------------------------------------------------|---------|----------|---------|---------|----|----|---------|-----------------|
| 4lexOpL(1,60-TATA)_pCYC1min (0 nM, 1) vs. 8lexOpL(1,60-TATA)_pCYC1min (0 nM, 2)         | 655.82  | 553.91   | 108.41  | 168.20  | 3  | 3  | 0.4354  | ns              |
| 4lexOpL(1,60-TATA)_pCYC1min (0.98 nM, 1) vs. 8lexOpL(1,60-TATA)_pCYC1min (0.98 nM, 2)   | 587.61  | 1063.60  | 139.09  | 396.94  | 3  | 3  | 0.1636  | ns              |
| 4lexOpL(1,60-TATA)_pCYC1min (1.95 nM, 1) vs. 8lexOpL(1,60-TATA)_pCYC1min (1.95 nM, 2)   | 639.12  | 1642.85  | 131.78  | 474.87  | 3  | 3  | 0.0582  | ns              |
| 4lexOpL(1,60-TATA)_pCYC1min (3.91 nM, 1) vs. 8lexOpL(1,60-TATA)_pCYC1min (3.91 nM, 2)   | 885.22  | 3235.19  | 231.94  | 614.96  | 3  | 3  | 0.0133  | *               |
| 4lexOpL(1,60-TATA)_pCYC1min (7.81 nM, 1) vs. 8lexOpL(1,60-TATA)_pCYC1min (7.81 nM, 2)   | 1516.21 | 6045.60  | 506.54  | 237.33  | 3  | 3  | 0.0010  | **              |
| 4lexOpL(1,60-TATA)_pCYC1min (15.63 nM, 1) vs. 8lexOpL(1,60-TATA)_pCYC1min (15.63 nM, 2) | 2922.75 | 10968.00 | 768.91  | 1212.85 | 3  | 3  | 0.0014  | **              |
| 4lexOpL(1,60-TATA)_pCYC1min (31.25 nM, 1) vs. 8lexOpL(1,60-TATA)_pCYC1min (31.25 nM, 2) | 3930.01 | 16222.13 | 1035.85 | 1444.40 | 3  | 3  | 0.0005  | ***             |
| 4lexOpL(1,60-TATA)_pCYC1min (62.5 nM, 1) vs. 8lexOpL(1,60-TATA)_pCYC1min (62.5 nM, 2)   | 5943.48 | 19991.04 | 677.67  | 1526.48 | 3  | 3  | 0.0011  | **              |
| 4lexOpL(1,60-TATA)_pCYC1min (125 nM, 1) vs. 8lexOpL(1,60-TATA)_pCYC1min (125 nM, 2)     | 6807.02 | 22776.37 | 575.03  | 1882.93 | 3  | 3  | 0.0025  | **              |
| 4lexOpL(1,60-TATA)_pCYC1min (250 nM, 1) vs. 8lexOpL(1,60-TATA)_pCYC1min (250 nM, 2)     | 7409.74 | 25079.19 | 790.71  | 772.10  | 3  | 3  | <0.0001 | ****            |
| 4lexOpL(1,60-TATA)_pCYC1min (500 nM, 1) vs. 8lexOpL(1,60-TATA)_pCYC1min (500 nM, 2)     | 8227.38 | 25488.84 | 634.55  | 1593.81 | 3  | 3  | 0.0009  | ***             |
| 4lexOpL(1,60-TATA)_pCYC1min (1000 nM, 1) vs. 8lexOpL(1,60-TATA)_pCYC1min (1000 nM, 2)   | 8379.75 | 23372.16 | 254.79  | 286.28  | 3  | 3  | <0.0001 | ****            |
| 4lexOpL(1,60-TATA)_pCYC1min (2000 nM, 1) vs. 8lexOpL(1,60-TATA)_pCYC1min (2000 nM, 2)   | 8449.45 | 24266.66 | 334.19  | 892.07  | 3  | 3  | 0.0003  | ***             |

**Table S23.** Transfer functions for the *S. cerevisiae* biosensors in our library (part A). The transfer function for byMM644 corresponds to  $y = y_0 + k \cdot \log_{10}(x)$ , where  $y_0$  is the value  $y$  takes when  $\log_{10}(x) = 0$ , and  $k$ —the slope—is given by  $\Delta y / \Delta(\log_{10}(x))$  when  $\Delta(\log_{10}(x)) \rightarrow 0$ . The transfer function for the other strains in this table is  $y = y_M \cdot y(0) / ((y_M - y(0)) \cdot \exp(-A \cdot x) + y(0))$ , where  $y(0)$  is the basal fluorescence value,  $y_M$  is the maximum fluorescence, and  $A$  is a constant such that the transfer function has an inflection point at  $x = \frac{\ln\left(\frac{y_M - y(0)}{y(0)}\right)}{A}$ .

| Strain  | Receptor               | Reporter                 | Fitting function                                                             | R <sup>2</sup> |
|---------|------------------------|--------------------------|------------------------------------------------------------------------------|----------------|
| byMM617 | pGPD-B42               | lexOpR(40-TATA)_pCYC1min | $y = 3414 \cdot 1052 / ((3414 - 1052) \cdot \exp(-0.003480 \cdot x) + 1052)$ | 0.9848         |
| byMM644 | pCMV-VP64              | lexOpR(40-TATA)_pCYC1min | $y = 1107 + 236.9 \cdot \log_{10}x$                                          | 0.9749         |
| byMM667 | DEG1t_pCYC1noTATA-VP64 | lexOpR(40-TATA)_pCYC1min | $y = 2572 \cdot 1166 / ((2572 - 1166) \cdot \exp(-0.04329 \cdot x) + 1166)$  | 0.9849         |

|          |                        |                                    |                                                       |        |
|----------|------------------------|------------------------------------|-------------------------------------------------------|--------|
| byMM888  | DEG1t_pCYC1noTATA-VP64 | 2lexOpR(1,40-TATA)_pCYC1min        | $y=2269*789.4/((2269-789.4)*\exp(-0.04243*x)+789.4)$  | 0.9926 |
| byMM890  | DEG1t_pCYC1noTATA-VP64 | 2lexOpR(20,40-TATA)_pCYC1min       | $y=4189*1335/((4189-1335)*\exp(-0.1129*x)+1335)$      | 0.9501 |
| byMM1449 | DEG1t_pCYC1noTATA-VP64 | lexOpL(40-TATA)_pCYC1min           | $y=2683*1241/((2683-1241)*\exp(-0.04741*x)+1241)$     | 0.9870 |
| byMM1450 | DEG1t_pCYC1noTATA-VP64 | lexOpR(1)lexOpL(40-TATA)_pCYC1min  | $y=4792*1298/((4792-1298)*\exp(-0.08667*x)+1298)$     | 0.9880 |
| byMM1451 | DEG1t_pCYC1noTATA-VP64 | 2lexOpL(1,40-TATA)_pCYC1min        | $y=4937*1328/((4937-1328)*\exp(-0.06010*x)+1328)$     | 0.9944 |
| byMM1452 | DEG1t_pCYC1noTATA-VP64 | 2lexOpL(20,40-TATA)_pCYC1min       | $y=4668*1125/((4668-1125)*\exp(-0.1107*x)+1125)$      | 0.9826 |
| byMM1454 | DEG1t_pCYC1noTATA-VP64 | lexOpR(20)lexOpL(40-TATA)_pCYC1min | $y=2810*1190/((2810-1190)*\exp(-0.07414*x)+1190)$     | 0.9636 |
| byMM1847 | DEG1t_pCYC1noTATA-VP64 | lexOpL(20-TATA)_pCYC1min           | $y=1224*550.8/((1224-550.8)*\exp(-0.03717*x)+550.8)$  | 0.9799 |
| byMM1904 | DEG1t_pCYC1noTATA-VP64 | lexOpL(60-TATA)_pCYC1min           | $y=4153*1435/((4153-1435)*\exp(-0.1313*x)+1435)$      | 0.9764 |
| byMM1973 | DEG1t_pCYC1noTATA-VP64 | 2lexOpL(40,40-TATA)_pCYC1min       | $y=3705*982.8/((3705-982.8)*\exp(-0.01738*x)+982.8)$  | 0.9771 |
| byMM1974 | pGPD-B42               | 2lexOpL(40,40-TATA)_pCYC1min       | $y=2290*340.4/((2290-340.4)*\exp(-0.006420*x)+340.4)$ | 0.9844 |
| byMM1982 | DEG1t_pCYC1noTATA-VP64 | 4lexOpL(1,60-TATA)_pCYC1min        | $y=7822*1010/((7822-1010)*\exp(-0.05520*x)+1010)$     | 0.9705 |

**Table S24.** Transfer functions for the *S. cerevisiae* biosensors in our library (part B). All transfer functions in this table have a quadratic form such as  $y = B_0 + B_1*x + B_2*x^2$ .

| Strain   | Receptor | Reporter                           | Fitting function                   | R <sup>2</sup> |
|----------|----------|------------------------------------|------------------------------------|----------------|
| byMM889  | pGPD-B42 | 2lexOpR(1,40-TATA)_pCYC1min        | $y=745.3 + 4.071*x - 0.001645*x^2$ | 0.9972         |
| byMM892  | pGPD-B42 | 2lexOpR(20,40-TATA)_pCYC1min       | $y=799.6 + 7.303*x - 0.004207*x^2$ | 0.9566         |
| byMM1480 | pGPD-B42 | lexOpL(40-TATA)_pCYC1min           | $y=917.5 + 4.928*x - 0.003717*x^2$ | 0.9872         |
| byMM1481 | pGPD-B42 | lexOpR(1)lexOpL(40-TATA)_pCYC1min  | $y=722.8 + 6.639*x - 0.002952*x^2$ | 0.9901         |
| byMM1482 | pGPD-B42 | 2lexOpL(1,40-TATA)_pCYC1min        | $y=648.8 + 6.686*x - 0.002729*x^2$ | 0.9964         |
| byMM1483 | pGPD-B42 | 2lexOpL(20,40-TATA)_pCYC1min       | $y=524.9 + 7.202*x - 0.002880*x^2$ | 0.9962         |
| byMM1484 | pGPD-B42 | lexOpL(1)lexOpR(40-TATA)_pCYC1min  | $y=653.9 + 7.577*x - 0.003225*x^2$ | 0.9612         |
| byMM1485 | pGPD-B42 | lexOpR(20)lexOpL(40-TATA)_pCYC1min | $y=464.9 + 7.155*x - 0.003036*x^2$ | 0.9935         |
| byMM1848 | pGPD-B42 | lexOpL(20-TATA)_pCYC1min           | $y=850.0 + 21.390*x - 0.03484*x^2$ | 0.9792         |
| byMM1905 | pGPD-B42 | lexOpL(60-TATA)_pCYC1min           | $y=1172 + 26.27*x - 0.04822*x^2$   | 0.9587         |
| byMM1983 | pGPD-B42 | 4lexOpL(1,60-TATA)_pCYC1min        | $y=-27.43 + 22.59*x - 0.01664*x^2$ | 0.9857         |
| byMM1985 | pGPD-B42 | 8lexOpL(1,60-TATA)_pCYC1min        | $y=-77.13 + 43.98*x - 0.02850*x^2$ | 0.9704         |

**Table S25.** Real sample recovery method: results. Cell solutions in SDC supplied with different amount of  $\beta$ -estradiol were used as real samples. For each biosensor, six  $\beta$ -estradiol concentrations were measured. Biosensor byMM381 is characterized by a larger detection range, whereas biosensor byMM1984 appears more precise. Both biosensors shown acceptable reproducibility and reliability for practical applications.

| Sample     | Added (nM) | Estimated (nM) | Recovery (%) | RSD (%) |
|------------|------------|----------------|--------------|---------|
| byMM381-1  | 5          | 4.64           | 92.80        | 11.91   |
| byMM381-2  | 25         | 22.93          | 91.72        | 6.64    |
| byMM381-3  | 50         | 52.17          | 104.34       | 3.86    |
| byMM381-4  | 100        | 110.98         | 110.98       | 7.49    |
| byMM381-5  | 300        | 292.37         | 97.46        | 7.37    |
| byMM381-6  | 500        | 532.38         | 106.48       | 4.03    |
| byMM1984-1 | 5          | 4.86           | 97.20        | 3.40    |
| byMM1984-2 | 10         | 10.47          | 104.70       | 4.98    |
| byMM1984-3 | 15         | 15.31          | 102.07       | 2.79    |
| byMM1984-4 | 20         | 20.37          | 101.85       | 2.04    |
| byMM1984-5 | 25         | 24.82          | 99.28        | 2.33    |
| byMM1984-6 | 30         | 30.49          | 101.63       | 0.92    |

**Table S26.** Statistical analysis of the results in Figure 3.

| Unpaired t test with Welch's correction | Mean 1   | Mean 2   | SD1      | SD2      | n1 | n2 | P value | P value summary |
|-----------------------------------------|----------|----------|----------|----------|----|----|---------|-----------------|
| 7 hours (1) vs. 14 hours (2)            | 25343.52 | 30841.1  | 1966.007 | 1037.302 | 3  | 3  | 0.0229  | *               |
| 14 hours (1) vs. 21 hours (2)           | 30841.1  | 30777.16 | 1037.302 | 874.2746 | 3  | 3  | 0.9390  | ns              |
| 14 hours (1) vs. 28 hours (2)           | 30841.1  | 30116.53 | 1037.302 | 1192.621 | 3  | 3  | 0.4724  | ns              |
| 21 hours (1) vs. 28 hours (2)           | 30777.16 | 30116.53 | 874.2746 | 1192.621 | 3  | 3  | 0.4859  | ns              |
| CYP1B1 (1) vs. Control (2)              | 970.71   | 524.43   | 187.67   | 75.86    | 7  | 7  | 0.0004  | ***             |
| CYP19A1 (1) vs. Control (2)             | 3183.43  | 330.71   | 308.2    | 56.26    | 7  | 7  | <0.0001 | ****            |

**Table S27.** Statistical analysis of the results in Figure 4B. 1 means CPR, 2 is CPR & CYP19A1, 3 stands for control.

| Ordinary one-way ANOVA           | Mean 1   | Mean 2   | Mean 3   | SD1    | SD2    | SD3    | n1 | n2 | n3 | P value | P value summary |
|----------------------------------|----------|----------|----------|--------|--------|--------|----|----|----|---------|-----------------|
| No inducer group                 | 1130.51  | 1123.58  | 1163.11  | 49.29  | 54.66  | 4.77   | 3  | 3  | 3  | 0.5106  | ns              |
| 2000 nM $\beta$ -estradiol group | 30922.05 | 31328.73 | 30872.80 | 742.85 | 490.90 | 909.82 | 3  | 3  | 3  | 0.7202  | ns              |
| 2000 nM Testosterone group       | 1155.68  | 31372.72 | 1154.35  | 73.08  | 526.06 | 67.01  | 3  | 3  | 3  | <0.0001 | ****            |

**Table S28.** Statistical analysis of the results in Figure 4D.

| Unpaired t test with Welch's correction                            | Mean 1  | Mean 2  | SD1    | SD2     | n1 | n2 | P value | P value summary |
|--------------------------------------------------------------------|---------|---------|--------|---------|----|----|---------|-----------------|
| VP64-β-estradiol (0 nM, 1) vs. VP64-testosterone (0 nM, 2)         | 1237.13 | 1531.69 | 15.86  | 106.46  | 3  | 3  | 0.0383  | *               |
| VP64-β-estradiol (0.98 nM, 1) vs. VP64-testosterone (0.98 nM, 2)   | 1538.34 | 3087.41 | 56.02  | 372.52  | 3  | 3  | 0.0170  | *               |
| VP64-β-estradiol (1.95 nM, 1) vs. VP64-testosterone (1.95 nM, 2)   | 1854.27 | 3595.62 | 25.14  | 383.16  | 3  | 3  | 0.0154  | *               |
| VP64-β-estradiol (3.91 nM, 1) vs. VP64-testosterone (3.91 nM, 2)   | 2523.54 | 3317.79 | 16.21  | 566.55  | 3  | 3  | 0.1358  | ns              |
| VP64-β-estradiol (7.81 nM, 1) vs. VP64-testosterone (7.81 nM, 2)   | 3142.85 | 2722.60 | 187.11 | 628.31  | 3  | 3  | 0.3674  | ns              |
| VP64-β-estradiol (15.63 nM, 1) vs. VP64-testosterone (15.63 nM, 2) | 506.92  | 2212.83 | 48.75  | 650.71  | 3  | 3  | 0.0445  | *               |
| VP64-β-estradiol (31.25 nM, 1) vs. VP64-testosterone (31.25 nM, 2) | 464.80  | 2590.64 | 35.05  | 421.81  | 3  | 3  | 0.0124  | *               |
| VP64-β-estradiol (62.5 nM, 1) vs. VP64-testosterone (62.5 nM, 2)   | 176.87  | 3351.21 | 4.77   | 935.32  | 3  | 3  | 0.0277  | *               |
| VP64-β-estradiol (125 nM, 1) vs. VP64-testosterone (125 nM, 2)     | 214.92  | 4251.44 | 10.79  | 827.81  | 3  | 3  | 0.0137  | *               |
| VP64-β-estradiol (250 nM, 1) vs. VP64-testosterone (250 nM, 2)     | 153.17  | 4956.78 | 4.14   | 1230.10 | 3  | 3  | 0.0212  | *               |
| VP64-β-estradiol (500 nM, 1) vs. VP64-testosterone (500 nM, 2)     | 134.52  | 5405.82 | 3.70   | 1737.41 | 3  | 3  | 0.0344  | *               |
| VP64-β-estradiol (1000 nM, 1) vs. VP64-testosterone (1000 nM, 2)   | 139.33  | 4238.16 | 2.60   | 1585.87 | 3  | 3  | 0.0464  | *               |
| VP64-β-estradiol (2000 nM, 1) vs. VP64-testosterone (2000 nM, 2)   | 140.84  | 3765.08 | 5.69   | 1106.08 | 3  | 3  | 0.0297  | *               |

**Table S29.** Statistical analysis of the results in Figure 4E.

| Unpaired t test with Welch's correction                                        | Mean 1  | Mean 2  | SD1    | SD2    | n1 | n2 | P value | P value summary |
|--------------------------------------------------------------------------------|---------|---------|--------|--------|----|----|---------|-----------------|
| mDR521_805-β-estradiol (0 nM, 1) vs. mDR521_805-testosterone (0 nM, 2)         | 228.32  | 28.41   | 51.16  | 12.67  | 3  | 3  | 0.0166  | *               |
| mDR521_805-β-estradiol (0.98 nM, 1) vs. mDR521_805-testosterone (0.98 nM, 2)   | 308.58  | 164.10  | 34.23  | 17.98  | 3  | 3  | 0.0073  | **              |
| mDR521_805-β-estradiol (1.95 nM, 1) vs. mDR521_805-testosterone (1.95 nM, 2)   | 468.58  | 535.03  | 33.75  | 180.71 | 3  | 3  | 0.5915  | ns              |
| mDR521_805-β-estradiol (3.91 nM, 1) vs. mDR521_805-testosterone (3.91 nM, 2)   | 661.69  | 1162.30 | 85.39  | 80.24  | 3  | 3  | 0.0018  | **              |
| mDR521_805-β-estradiol (7.81 nM, 1) vs. mDR521_805-testosterone (7.81 nM, 2)   | 1213.98 | 1688.66 | 120.66 | 173.34 | 3  | 3  | 0.0219  | *               |
| mDR521_805-β-estradiol (15.63 nM, 1) vs. mDR521_805-testosterone (15.63 nM, 2) | 2093.28 | 1704.39 | 145.96 | 217.79 | 3  | 3  | 0.0709  | ns              |
| mDR521_805-β-estradiol (31.25 nM, 1) vs. mDR521_805-testosterone (31.25 nM, 2) | 2501.57 | 1448.83 | 79.26  | 176.67 | 3  | 3  | 0.0035  | **              |
| mDR521_805-β-estradiol (62.5 nM, 1) vs. mDR521_805-testosterone (62.5 nM, 2)   | 2717.01 | 1588.16 | 208.69 | 108.11 | 3  | 3  | 0.0036  | **              |
| mDR521_805-β-estradiol (125 nM, 1) vs. mDR521_805-testosterone (125 nM, 2)     | 3088.08 | 1298.34 | 273.90 | 511.10 | 3  | 3  | 0.0122  | *               |
| mDR521_805-β-estradiol (250 nM, 1) vs. mDR521_805-testosterone (250 nM, 2)     | 1127.40 | 1747.82 | 320.43 | 229.39 | 3  | 3  | 0.0586  | ns              |
| mDR521_805-β-estradiol (500 nM, 1) vs. mDR521_805-testosterone (500 nM, 2)     | 134.91  | 1415.42 | 21.52  | 639.73 | 3  | 3  | 0.0739  | ns              |
| mDR521_805-β-estradiol (1000 nM, 1) vs. mDR521_805-testosterone (1000 nM, 2)   | 82.86   | 2181.44 | 32.67  | 320.71 | 3  | 3  | 0.0072  | **              |
| mDR521_805-β-estradiol (2000 nM, 1) vs. mDR521_805-testosterone (2000 nM, 2)   | 75.29   | 2017.85 | 28.60  | 149.89 | 3  | 3  | 0.0014  | **              |

**Table S30.** Statistical analysis of the results in Figure 6B.

| Unpaired t test with Welch's correction | Mean 1   | Mean 2   | SD1    | SD2    | n1 | n2 | P value | P value summary |
|-----------------------------------------|----------|----------|--------|--------|----|----|---------|-----------------|
| Control (1) vs.CYP1B1 (2)               | 30164.79 | 20814.40 | 516.99 | 812.19 | 3  | 3  | 0.0002  | ***             |
| Control (1) vs.CYP2C9 (2)               | 30164.79 | 26449.65 | 516.99 | 259.48 | 3  | 3  | 0.0017  | **              |
| Control (1) vs.CYP5A1 (2)               | 30164.79 | 29829.99 | 516.99 | 381.43 | 3  | 3  | 0.4219  | ns              |
| Control (1) vs.CYP19A1 (2)              | 30164.79 | 29872.51 | 516.99 | 421.46 | 3  | 3  | 0.4910  | ns              |
| CYP1B1 (1) vs.CYP2C9 (2)                | 20814.40 | 26449.65 | 812.19 | 259.48 | 3  | 3  | 0.0037  | **              |
